# Supplementary material for: Characterization of the low energy conformations and differential reactivities of d-glucose and d-mannose based oxepines
Source: Royal Society of Chemistry journal article supplement (doi:10.1039/d1ob01900g), 2021-01-01
Supplement: d1ob01900g1.zip [file d1ob01900g1.zip]

## Sheet: Chair
Column1	E (kJ)	E (kcal)	Rel E (kcal)
1	-391.125	-93.4811	0
2	-389.52	-93.0975	0.383556
3	-387.648	-92.6501	0.830927
4	-387.465	-92.6063	0.874809
5	-386.403	-92.3526	1.12849
6	-386.295	-92.3266	1.15445
7	-385.343	-92.0992	1.38184
8	-384.369	-91.8665	1.6146
9	-384.106	-91.8035	1.67753
10	-384.099	-91.8018	1.6793
11	-383.417	-91.6388	1.84228
12	-383.209	-91.5891	1.89202
13	-382.945	-91.526	1.95509
14	-382.799	-91.4912	1.98984
15	-382.509	-91.4217	2.05935
16	-382.46	-91.41	2.07103
17	-381.435	-91.1652	2.31587
18	-381.231	-91.1164	2.36465
19	-380.585	-90.962	2.51907
20	-379.751	-90.7626	2.71848
21	-379.601	-90.7267	2.75435
22	-378.722	-90.5167	2.96434
23	-378.152	-90.3804	3.10067
24	-377.685	-90.2689	3.21219
25	-376.587	-90.0066	3.4745
26	-375.346	-89.71	3.7711
27	-374.996	-89.6263	3.85478
28	-374.988	-89.6244	3.85667
29	-374.788	-89.5765	3.90459
30	-374.344	-89.4703	4.01078
31	-373.189	-89.1944	4.28671
32	-372.632	-89.0611	4.41998
33	-372.066	-88.926	4.55507
34	-372.066	-88.926	4.55511
35	-371.74	-88.8479	4.63315
36	-371.542	-88.8007	4.68033
37	-371.283	-88.7387	4.74233
38	-370.896	-88.6462	4.83492
39	-370.534	-88.5598	4.92132
40	-369.394	-88.2874	5.19369
41	-369.335	-88.2732	5.20786
42	-368.697	-88.1208	5.3603
43	-368.684	-88.1176	5.3635
44	-368.639	-88.1069	5.37419
45	-367.614	-87.8618	5.61929
46	-366.275	-87.5418	5.93932
47	-365.473	-87.3502	6.13086
48	-365.337	-87.3177	6.16336
49	-364.948	-87.2246	6.25645
50	-364.637	-87.1504	6.33071
51	-363.876	-86.9684	6.51269
52	-361.86	-86.4867	6.99436
53	-361.415	-86.3803	7.10074
54	-361.252	-86.3414	7.13965
55	-361.031	-86.2884	7.19266
56	-360.669	-86.202	7.27904
57	-360.281	-86.1093	7.3718
58	-358.863	-85.7704	7.71071
59	-357.911	-85.5427	7.93836
60	-357.524	-85.4504	8.03069
61	-356.79	-85.275	8.20612
62	-356.372	-85.175	8.30605
63	-356.229	-85.1408	8.34025
64	-356.222	-85.1392	8.34187
65	-356.088	-85.1072	8.3739
66	-355.954	-85.0751	8.40593
67	-355.872	-85.0554	8.42565
68	-355.861	-85.0529	8.42818
69	-355.158	-84.8847	8.59639
70	-354.906	-84.8245	8.65655
71	-354.721	-84.7802	8.70084
72	-354.445	-84.7145	8.76656
73	-354.206	-84.6572	8.8239
74	-354.052	-84.6204	8.86071
75	-353.962	-84.599	8.88207
76	-353.937	-84.593	8.88803
77	-353.573	-84.5059	8.97517
78	-353.224	-84.4227	9.05839
79	-353.218	-84.4212	9.05985
80	-353.113	-84.3961	9.08494
81	-352.706	-84.2988	9.18229
82	-352.425	-84.2317	9.2494
83	-352.352	-84.2142	9.26687
84	-352.237	-84.1866	9.29443
85	-352.059	-84.1441	9.33697
86	-352.034	-84.1382	9.34283
87	-352.028	-84.1367	9.34438
88	-351.991	-84.128	9.35308
89	-351.948	-84.1177	9.36338
90	-351.626	-84.0407	9.44039
91	-351.584	-84.0306	9.4505
92	-351.524	-84.0162	9.46484
93	-351.5	-84.0106	9.47051
94	-351.386	-83.9833	9.49775
95	-351.353	-83.9754	9.50571
96	-351.345	-83.9734	9.50765
97	-351.189	-83.9363	9.54481
98	-351.128	-83.9215	9.55954
99	-351.103	-83.9156	9.56546
100	-350.743	-83.8295	9.6516
101	-350.309	-83.7258	9.75523
102	-350.261	-83.7143	9.76678
103	-350.051	-83.6641	9.81695
104	-349.992	-83.6501	9.83093
105	-349.799	-83.6039	9.8772
106	-349.503	-83.5331	9.94794
107	-349.226	-83.4669	10.0142
108	-349.222	-83.4661	10.015
109	-348.927	-83.3956	10.0855
110	-348.906	-83.3907	10.0904
111	-348.633	-83.3253	10.1558
112	-348.229	-83.2288	10.2522
113	-348.077	-83.1924	10.2887
114	-347.912	-83.1529	10.3282
115	-347.563	-83.0696	10.4114
116	-347.422	-83.0359	10.4451
117	-347.355	-83.0198	10.4613
118	-347.348	-83.0181	10.463
119	-347.197	-82.9821	10.4989
120	-346.933	-82.919	10.5621
121	-346.85	-82.8992	10.5819
122	-346.614	-82.8427	10.6384
123	-346.136	-82.7285	10.7526
124	-345.902	-82.6726	10.8084
125	-345.724	-82.6301	10.851
126	-345.694	-82.6229	10.8582
127	-345.503	-82.5772	10.9039
128	-345.19	-82.5023	10.9788
129	-344.757	-82.3988	11.0823
130	-344.726	-82.3914	11.0897
131	-344.664	-82.3767	11.1043
132	-344.587	-82.3583	11.1227
133	-344.439	-82.3228	11.1582
134	-344.424	-82.3193	11.1617
135	-343.657	-82.136	11.345
136	-343.629	-82.1294	11.3517
137	-343.58	-82.1175	11.3636
138	-343.374	-82.0685	11.4126
139	-343.103	-82.0035	11.4775
140	-343.05	-81.9908	11.4902
141	-342.934	-81.9632	11.5179
142	-342.893	-81.9533	11.5278
143	-342.787	-81.9281	11.5529
144	-342.695	-81.9061	11.575
145	-342.551	-81.8716	11.6095
146	-342.318	-81.8159	11.6652
147	-342.237	-81.7966	11.6845
148	-342.234	-81.7958	11.6852
149	-341.987	-81.7369	11.7441
150	-341.71	-81.6706	11.8105
151	-341.604	-81.6452	11.8359
152	-341.508	-81.6224	11.8587
153	-341.476	-81.6147	11.8663
154	-341.303	-81.5735	11.9076
155	-341.29	-81.5703	11.9108
156	-341.286	-81.5694	11.9117
157	-341.07	-81.5177	11.9634
158	-340.853	-81.4657	12.0153
159	-340.832	-81.4608	12.0203
160	-340.536	-81.39	12.0911
161	-340.419	-81.3621	12.1189
162	-340.395	-81.3564	12.1247
163	-340.322	-81.3389	12.1421
164	-340.297	-81.333	12.1481
165	-340.272	-81.3269	12.1542
166	-340.176	-81.304	12.1771
167	-340.04	-81.2714	12.2097
168	-339.705	-81.1915	12.2896
169	-339.52	-81.1472	12.3339
170	-339.311	-81.0973	12.3837
171	-339.308	-81.0965	12.3846
172	-339.106	-81.0482	12.4328
173	-338.884	-80.9953	12.4858
174	-338.756	-80.9647	12.5164
175	-338.253	-80.8445	12.6365
176	-338.009	-80.7862	12.6949
177	-337.918	-80.7644	12.7166
178	-337.892	-80.7582	12.7228
179	-337.839	-80.7454	12.7357
180	-337.372	-80.6339	12.8472
181	-337.368	-80.6328	12.8483
182	-337.34	-80.6263	12.8548
183	-337.089	-80.5662	12.9149
184	-337.081	-80.5644	12.9167
185	-337.026	-80.5511	12.93
186	-337.017	-80.549	12.9321
187	-337.015	-80.5486	12.9325
188	-336.98	-80.5402	12.9409
189	-336.705	-80.4744	13.0067
190	-336.694	-80.4718	13.0092
191	-336.329	-80.3845	13.0966
192	-336.225	-80.3598	13.1213
193	-336.143	-80.3401	13.141
194	-336.014	-80.3094	13.1717
195	-335.75	-80.2463	13.2348
196	-335.565	-80.202	13.2791
197	-335.472	-80.1796	13.3014
198	-335.293	-80.1369	13.3442
199	-335.236	-80.1232	13.3579
200	-334.908	-80.0448	13.4362
201	-334.893	-80.0413	13.4398
202	-334.448	-79.935	13.546
203	-334.374	-79.9173	13.5637
204	-334.268	-79.892	13.5891
205	-334.171	-79.8689	13.6122
206	-333.929	-79.8109	13.6702
207	-333.912	-79.8069	13.6742
208	-333.862	-79.795	13.6861
209	-333.704	-79.7572	13.7239
210	-333.488	-79.7054	13.7756
211	-333.474	-79.7022	13.7788
212	-333.428	-79.6913	13.7898
213	-333.332	-79.6683	13.8128
214	-333.163	-79.6279	13.8532
215	-333.147	-79.6241	13.857
216	-332.85	-79.553	13.9281
217	-332.826	-79.5472	13.9338
218	-332.403	-79.4462	14.0348
219	-332.15	-79.3858	14.0953
220	-331.996	-79.3489	14.1321
221	-331.712	-79.2811	14.1999
222	-331.708	-79.2802	14.2009
223	-331.674	-79.272	14.2091
224	-331.41	-79.2089	14.2722
225	-330.718	-79.0434	14.4377
226	-330.639	-79.0245	14.4565
227	-330.268	-78.9359	14.5451
228	-330.015	-78.8755	14.6056
229	-329.505	-78.7537	14.7274
230	-329.175	-78.6748	14.8062
231	-329.157	-78.6705	14.8106
232	-328.99	-78.6304	14.8506
233	-328.878	-78.6038	14.8773
234	-328.819	-78.5897	14.8914
235	-328.786	-78.5818	14.8992
236	-328.766	-78.5771	14.904
237	-328.665	-78.5529	14.9282
238	-328.281	-78.461	15.0201
239	-328.162	-78.4326	15.0485
240	-327.628	-78.305	15.1761
241	-327.572	-78.2916	15.1895
242	-327.52	-78.2791	15.2019
243	-327.403	-78.2512	15.2298
244	-327.363	-78.2417	15.2393
245	-327.171	-78.1958	15.2852
246	-327.092	-78.1769	15.3042
247	-327.014	-78.1582	15.3228
248	-326.944	-78.1414	15.3397
249	-326.915	-78.1345	15.3466
250	-326.748	-78.0945	15.3865
251	-326.728	-78.0897	15.3913
252	-326.711	-78.0858	15.3952
253	-326.627	-78.0657	15.4154
254	-326.429	-78.0183	15.4627
255	-326.386	-78.0082	15.4728
256	-326.054	-77.9288	15.5523
257	-325.995	-77.9146	15.5664
258	-325.932	-77.8997	15.5814
259	-325.875	-77.8859	15.5951
260	-325.863	-77.8831	15.598
261	-325.814	-77.8715	15.6096
262	-325.387	-77.7695	15.7116
263	-325.3	-77.7484	15.7326
264	-325.187	-77.7215	15.7596
265	-325.077	-77.6952	15.7858
266	-324.979	-77.6718	15.8093
267	-324.841	-77.6389	15.8421
268	-324.807	-77.6306	15.8505
269	-324.762	-77.62	15.8611
270	-324.683	-77.601	15.8801
271	-324.66	-77.5955	15.8856
272	-324.575	-77.5753	15.9057
273	-324.559	-77.5714	15.9097
274	-324.345	-77.5203	15.9608
275	-324.214	-77.4889	15.9922
276	-324.035	-77.4463	16.0348
277	-323.893	-77.4122	16.0689
278	-323.626	-77.3485	16.1326
279	-323.54	-77.328	16.1531
280	-323.483	-77.3143	16.1667
281	-323.317	-77.2745	16.2065
282	-323.146	-77.2337	16.2474
283	-323.064	-77.2142	16.2669
284	-322.92	-77.1798	16.3013
285	-322.858	-77.1649	16.3162
286	-322.828	-77.1578	16.3233
287	-322.604	-77.1042	16.3769
288	-322.475	-77.0734	16.4076
289	-322.195	-77.0065	16.4746
290	-322.053	-76.9726	16.5084
291	-321.953	-76.9486	16.5325
292	-321.919	-76.9405	16.5405
293	-321.815	-76.9156	16.5655
294	-321.661	-76.8788	16.6023
295	-321.452	-76.8289	16.6522
296	-320.768	-76.6655	16.8156
297	-320.685	-76.6456	16.8355
298	-320.636	-76.6339	16.8472
299	-320.627	-76.6316	16.8495
300	-320.322	-76.5589	16.9222
301	-320.322	-76.5588	16.9223
302	-320.234	-76.5378	16.9432
303	-320.228	-76.5363	16.9448
304	-320.045	-76.4927	16.9884
305	-320.008	-76.4837	16.9974
306	-319.896	-76.4569	17.0241
307	-319.663	-76.4013	17.0798
308	-319.612	-76.3891	17.0919
309	-319.603	-76.387	17.094
310	-319.53	-76.3694	17.1116
311	-319.085	-76.2632	17.2179
312	-318.884	-76.215	17.2661
313	-318.877	-76.2135	17.2676
314	-318.877	-76.2134	17.2677
315	-318.844	-76.2057	17.2754
316	-318.773	-76.1886	17.2924
317	-318.628	-76.1539	17.3272
318	-318.487	-76.1202	17.3609
319	-318.437	-76.1082	17.3729
320	-318.127	-76.0341	17.447
321	-318.038	-76.0129	17.4681
322	-317.974	-75.9975	17.4835
323	-317.97	-75.9966	17.4845
324	-317.748	-75.9436	17.5375
325	-317.723	-75.9375	17.5435
326	-317.719	-75.9366	17.5445
327	-317.563	-75.8994	17.5817
328	-317.419	-75.8649	17.6162
329	-316.867	-75.7329	17.7481
330	-316.613	-75.6723	17.8088
331	-316.559	-75.6593	17.8217
332	-316.547	-75.6565	17.8245
333	-316.342	-75.6076	17.8734
334	-316.083	-75.5457	17.9353
335	-315.781	-75.4736	18.0075
336	-315.649	-75.4419	18.0392
337	-315.635	-75.4387	18.0424
338	-315.606	-75.4316	18.0495
339	-315.515	-75.41	18.0711
340	-315.398	-75.3819	18.0991
341	-315.315	-75.3622	18.1189
342	-315.277	-75.3531	18.128
343	-315.263	-75.3497	18.1314
344	-315.024	-75.2927	18.1884
345	-315.005	-75.2879	18.1932
346	-314.998	-75.2864	18.1947
347	-314.901	-75.2631	18.218
348	-314.803	-75.2396	18.2414
349	-314.306	-75.1209	18.3602
350	-314.291	-75.1173	18.3638
351	-314.281	-75.1149	18.3662
352	-314.254	-75.1086	18.3725
353	-314.102	-75.0722	18.4089
354	-314.063	-75.0629	18.4182
355	-313.763	-74.9912	18.4899
356	-313.516	-74.9321	18.549
357	-313.502	-74.9289	18.5522
358	-313.395	-74.9032	18.5779
359	-313.352	-74.8929	18.5881
360	-312.971	-74.8018	18.6793
361	-312.858	-74.7749	18.7062
362	-312.632	-74.7209	18.7601
363	-312.475	-74.6834	18.7977
364	-312.343	-74.6518	18.8293
365	-312.252	-74.6301	18.851
366	-312.08	-74.5889	18.8922
367	-311.99	-74.5675	18.9136
368	-311.809	-74.5242	18.9569
369	-311.706	-74.4995	18.9816
370	-311.405	-74.4276	19.0535
371	-311.383	-74.4223	19.0587
372	-311.237	-74.3875	19.0936
373	-311.159	-74.3687	19.1124
374	-311.029	-74.3377	19.1433
375	-311.028	-74.3375	19.1436
376	-310.822	-74.2882	19.1929
377	-310.711	-74.2617	19.2194
378	-310.705	-74.2603	19.2207
379	-310.655	-74.2484	19.2326
380	-310.378	-74.1821	19.2989
381	-310.332	-74.171	19.3101
382	-310.138	-74.1248	19.3563
383	-310.009	-74.0939	19.3872
384	-309.758	-74.034	19.4471
385	-309.524	-73.9781	19.503
386	-309.338	-73.9335	19.5475
387	-309.298	-73.924	19.557
388	-309.242	-73.9107	19.5704
389	-308.974	-73.8465	19.6346
390	-308.924	-73.8346	19.6465
391	-308.905	-73.83	19.651
392	-308.698	-73.7806	19.7005
393	-308.617	-73.7612	19.7198
394	-308.588	-73.7544	19.7267
395	-308.486	-73.7299	19.7511
396	-308.342	-73.6955	19.7856
397	-308.268	-73.6778	19.8033
398	-308.212	-73.6643	19.8167
399	-308.137	-73.6465	19.8346
400	-307.961	-73.6043	19.8767
401	-307.932	-73.5976	19.8835
402	-307.925	-73.5957	19.8853
403	-307.88	-73.585	19.8961
404	-307.812	-73.5689	19.9122
405	-307.652	-73.5305	19.9506
406	-307.648	-73.5297	19.9514
407	-307.64	-73.5277	19.9534
408	-307.448	-73.4818	19.9992
409	-307.29	-73.4441	20.037
410	-307.203	-73.4233	20.0578
411	-307.111	-73.4013	20.0798
412	-306.614	-73.2826	20.1985
413	-306.247	-73.1948	20.2863
414	-306.225	-73.1895	20.2916
415	-306.049	-73.1474	20.3337
416	-306.034	-73.144	20.3371
417	-305.818	-73.0923	20.3888
418	-305.518	-73.0206	20.4605
419	-305.408	-72.9942	20.4869
420	-305.407	-72.9941	20.487
421	-305.394	-72.9909	20.4902
422	-305.006	-72.8982	20.5829
423	-304.97	-72.8897	20.5914
424	-304.888	-72.87	20.611
425	-304.859	-72.863	20.618
426	-304.805	-72.8502	20.6308
427	-304.68	-72.8204	20.6607
428	-304.478	-72.7719	20.7092
429	-304.434	-72.7616	20.7195
430	-304.424	-72.7592	20.7219
431	-304.35	-72.7413	20.7397
432	-304.324	-72.7351	20.746
433	-304.265	-72.7211	20.76
434	-303.981	-72.6533	20.8278
435	-303.907	-72.6356	20.8455
436	-303.755	-72.5992	20.8819
437	-303.752	-72.5984	20.8826
438	-303.746	-72.597	20.884
439	-303.613	-72.5652	20.9159
440	-303.556	-72.5517	20.9293
441	-303.555	-72.5514	20.9296
442	-303.088	-72.4397	21.0413
443	-303.071	-72.4357	21.0453
444	-303.007	-72.4203	21.0608
445	-302.667	-72.3392	21.1418
446	-302.225	-72.2336	21.2475
447	-302.197	-72.2269	21.2542
448	-301.631	-72.0916	21.3894
449	-301.497	-72.0595	21.4216
450	-301.441	-72.0462	21.4349
451	-301.307	-72.0142	21.4669
452	-301.227	-71.9951	21.486
453	-300.97	-71.9335	21.5476
454	-300.837	-71.9018	21.5792
455	-300.599	-71.8448	21.6363
456	-300.528	-71.828	21.6531
457	-300.52	-71.826	21.655
458	-300.441	-71.8072	21.6739
459	-300.436	-71.8059	21.6752
460	-300.129	-71.7325	21.7486
461	-300.118	-71.7299	21.7511
462	-300.074	-71.7194	21.7617
463	-299.856	-71.6674	21.8136
464	-299.835	-71.6623	21.8188
465	-299.238	-71.5196	21.9615
466	-299.184	-71.5068	21.9743
467	-299.096	-71.4857	21.9954
468	-299.002	-71.4631	22.018
469	-298.862	-71.4297	22.0513
470	-298.852	-71.4273	22.0537
471	-298.845	-71.4258	22.0553
472	-298.752	-71.4033	22.0777
473	-298.419	-71.3239	22.1572
474	-298.394	-71.3178	22.1633
475	-298.275	-71.2894	22.1917
476	-298.246	-71.2824	22.1987
477	-298.164	-71.263	22.2181
478	-298.164	-71.263	22.2181
479	-298.04	-71.2333	22.2477
480	-297.42	-71.0852	22.3959
481	-297.345	-71.0672	22.4139
482	-297.175	-71.0265	22.4546
483	-297.083	-71.0045	22.4766
484	-297.005	-70.986	22.4951
485	-297.002	-70.9852	22.4959
486	-296.974	-70.9785	22.5026
487	-296.87	-70.9537	22.5274
488	-296.606	-70.8905	22.5905
489	-296.595	-70.8879	22.5932
490	-296.438	-70.8503	22.6307
491	-296.416	-70.8451	22.636
492	-296.344	-70.8279	22.6531
493	-295.996	-70.7448	22.7363
494	-295.995	-70.7445	22.7366
495	-295.936	-70.7303	22.7508
496	-295.874	-70.7156	22.7655
497	-295.688	-70.6712	22.8098
498	-295.585	-70.6465	22.8345
499	-295.574	-70.6439	22.8371
500	-295.417	-70.6063	22.8748
501	-295.34	-70.5879	22.8932
502	-295.338	-70.5875	22.8936
503	-295.248	-70.5661	22.915
504	-294.992	-70.5049	22.9762
505	-294.983	-70.5026	22.9785
506	-294.967	-70.4989	22.9822
507	-294.857	-70.4725	23.0086
508	-294.762	-70.4499	23.0312
509	-294.637	-70.42	23.0611
510	-294.571	-70.4041	23.077
511	-294.425	-70.3693	23.1117
512	-294.306	-70.3408	23.1402
513	-294.199	-70.3153	23.1658
514	-294.195	-70.3143	23.1668
515	-294.124	-70.2972	23.1838
516	-294.121	-70.2966	23.1845
517	-294.083	-70.2876	23.1935
518	-294.067	-70.2837	23.1973
519	-293.946	-70.2547	23.2264
520	-293.711	-70.1985	23.2826
521	-293.597	-70.1713	23.3098
522	-292.977	-70.0232	23.4579
523	-292.881	-70.0001	23.4809
524	-292.682	-69.9527	23.5284
525	-292.494	-69.9078	23.5733
526	-292.483	-69.905	23.5761
527	-292.446	-69.8962	23.5849
528	-292.428	-69.8919	23.5891
529	-292.352	-69.8738	23.6072
530	-292.284	-69.8575	23.6236
531	-292.099	-69.8132	23.6679
532	-292.002	-69.7902	23.6908
533	-291.987	-69.7865	23.6946
534	-291.937	-69.7745	23.7065
535	-291.884	-69.7618	23.7192
536	-291.827	-69.7484	23.7326
537	-291.77	-69.7348	23.7463
538	-291.762	-69.7328	23.7483
539	-291.717	-69.722	23.7591
540	-291.694	-69.7166	23.7645
541	-291.623	-69.6996	23.7814
542	-291.067	-69.5667	23.9144
543	-291.062	-69.5655	23.9155
544	-291.023	-69.5561	23.925
545	-290.954	-69.5397	23.9413
546	-290.863	-69.518	23.963
547	-290.818	-69.5073	23.9738
548	-290.818	-69.5071	23.9739
549	-290.799	-69.5027	23.9784
550	-290.656	-69.4684	24.0126
551	-290.407	-69.409	24.0721
552	-290.387	-69.4041	24.077
553	-290.37	-69.4002	24.0809
554	-290.329	-69.3903	24.0908
555	-290.327	-69.3899	24.0912
556	-289.999	-69.3114	24.1696
557	-289.657	-69.2298	24.2513
558	-289.629	-69.223	24.2581
559	-289.381	-69.1638	24.3173
560	-289.197	-69.1197	24.3614
561	-288.971	-69.0656	24.4154
562	-288.822	-69.03	24.4511
563	-288.802	-69.0252	24.4558
564	-288.669	-68.9936	24.4874
565	-288.287	-68.9022	24.5789
566	-288.242	-68.8914	24.5897
567	-288.224	-68.8871	24.594
568	-288.084	-68.8538	24.6273
569	-288.03	-68.8408	24.6402
570	-287.977	-68.8281	24.6529
571	-287.968	-68.826	24.6551
572	-287.91	-68.812	24.669
573	-287.899	-68.8096	24.6715
574	-287.719	-68.7665	24.7146
575	-287.605	-68.7391	24.7419
576	-287.603	-68.7386	24.7424
577	-287.39	-68.6878	24.7933
578	-286.859	-68.561	24.9201
579	-286.841	-68.5566	24.9245
580	-286.752	-68.5353	24.9457
581	-286.716	-68.5268	24.9542
582	-286.67	-68.5157	24.9654
583	-286.582	-68.4949	24.9862
584	-286.533	-68.483	24.9981
585	-286.52	-68.4799	25.0012
586	-286.452	-68.4638	25.0173
587	-286.372	-68.4444	25.0366
588	-286.334	-68.4354	25.0457
589	-286.182	-68.399	25.082
590	-286.087	-68.3764	25.1047
591	-286.072	-68.373	25.1081
592	-285.971	-68.3488	25.1323
593	-285.637	-68.2688	25.2122
594	-285.572	-68.2532	25.2278
595	-285.497	-68.2355	25.2456
596	-285.054	-68.1296	25.3515
597	-285.045	-68.1273	25.3538
598	-285.008	-68.1185	25.3626
599	-284.976	-68.1109	25.3701
600	-284.936	-68.1013	25.3798
601	-284.935	-68.1011	25.38
602	-284.881	-68.0882	25.3928
603	-284.598	-68.0205	25.4605
604	-284.334	-67.9576	25.5235
605	-284.308	-67.9514	25.5297
606	-283.922	-67.859	25.6221
607	-283.71	-67.8084	25.6727
608	-283.666	-67.7978	25.6833
609	-283.566	-67.7738	25.7073
610	-283.473	-67.7517	25.7293
611	-283.403	-67.7349	25.7462
612	-283.308	-67.7122	25.7689
613	-283.168	-67.6789	25.8022
614	-283.139	-67.6718	25.8093
615	-283.123	-67.6681	25.813
616	-282.832	-67.5984	25.8826
617	-282.42	-67.4999	25.9811
618	-282.327	-67.4777	26.0034
619	-281.99	-67.3971	26.084
620	-281.6	-67.304	26.1771
621	-281.488	-67.2773	26.2038
622	-281.476	-67.2745	26.2066
623	-281.468	-67.2726	26.2085
624	-281.275	-67.2264	26.2547
625	-281.234	-67.2164	26.2646
626	-281.154	-67.1974	26.2836
627	-281.151	-67.1966	26.2845
628	-281.127	-67.191	26.2901
629	-281.119	-67.189	26.292
630	-281.082	-67.1802	26.3009
631	-280.806	-67.1142	26.3668
632	-280.732	-67.0965	26.3846
633	-280.702	-67.0895	26.3916
634	-280.689	-67.0862	26.3949
635	-280.63	-67.0721	26.409
636	-280.49	-67.0387	26.4423
637	-280.333	-67.0013	26.4798
638	-280.271	-66.9864	26.4946
639	-280.066	-66.9373	26.5438
640	-280.05	-66.9335	26.5476
641	-280.024	-66.9273	26.5537
642	-279.969	-66.9143	26.5668
643	-279.884	-66.8939	26.5872
644	-279.67	-66.8428	26.6383
645	-279.653	-66.8386	26.6425
646	-279.516	-66.806	26.6751
647	-279.434	-66.7863	26.6948
648	-279.296	-66.7534	26.7276
649	-279.214	-66.7338	26.7473
650	-278.863	-66.6499	26.8311
651	-278.767	-66.6268	26.8542
652	-278.729	-66.6178	26.8632
653	-278.624	-66.5927	26.8884
654	-278.574	-66.5808	26.9003
655	-278.454	-66.5521	26.929
656	-278.317	-66.5195	26.9616
657	-278.198	-66.491	26.9901
658	-277.969	-66.4361	27.045
659	-277.871	-66.4127	27.0683
660	-277.769	-66.3885	27.0926
661	-277.579	-66.343	27.1381
662	-277.411	-66.3029	27.1782
663	-277.383	-66.2962	27.1849
664	-277.311	-66.2789	27.2021
665	-277.307	-66.278	27.2031
666	-277.083	-66.2245	27.2566
667	-276.986	-66.2013	27.2798
668	-276.937	-66.1896	27.2915
669	-276.692	-66.131	27.3501
670	-276.69	-66.1305	27.3505
671	-276.621	-66.114	27.3671
672	-276.373	-66.0547	27.4264
673	-276.289	-66.0346	27.4465
674	-276.283	-66.0331	27.4479
675	-275.993	-65.9639	27.5172
676	-275.731	-65.9014	27.5797
677	-275.178	-65.7692	27.7119
678	-275.01	-65.7289	27.7522
679	-274.852	-65.6912	27.7899
680	-274.735	-65.6632	27.8179
681	-274.684	-65.651	27.83
682	-274.443	-65.5935	27.8876
683	-274.237	-65.5442	27.9368
684	-274.062	-65.5024	27.9787
685	-273.932	-65.4714	28.0097
686	-273.827	-65.4463	28.0347
687	-273.489	-65.3655	28.1156
688	-273.345	-65.3311	28.15
689	-272.458	-65.119	28.3621
690	-272.337	-65.0902	28.3909
691	-271.961	-65.0002	28.4809
692	-271.951	-64.9979	28.4832
693	-271.7	-64.9378	28.5433
694	-271.443	-64.8764	28.6046
695	-271.046	-64.7815	28.6996
696	-270.949	-64.7584	28.7227
697	-270.763	-64.714	28.7671
698	-270.252	-64.5917	28.8894
699	-270.245	-64.5902	28.8908
700	-270.088	-64.5525	28.9286
701	-269.465	-64.4037	29.0774
702	-269.407	-64.3899	29.0912
703	-269.245	-64.351	29.1301
704	-268.882	-64.2644	29.2167
705	-268.881	-64.2641	29.217
706	-268.847	-64.256	29.2251
707	-268.8	-64.2447	29.2364
708	-268.627	-64.2034	29.2777
709	-268.594	-64.1956	29.2854
710	-268.564	-64.1884	29.2926
711	-268.515	-64.1767	29.3044
712	-268.227	-64.1079	29.3732
713	-268.218	-64.1056	29.3754
714	-267.637	-63.9669	29.5142
715	-267.602	-63.9584	29.5227
716	-267.576	-63.9521	29.5289
717	-267.474	-63.9278	29.5533
718	-266.63	-63.726	29.755
719	-266.613	-63.7219	29.7591
720	-265.939	-63.5609	29.9202
721	-265.478	-63.4509	30.0302
722	-264.898	-63.312	30.169
723	-264.716	-63.2685	30.2125
724	-264.706	-63.2663	30.2147
725	-264.195	-63.1441	30.337
726	-264.117	-63.1255	30.3556
727	-263.871	-63.0666	30.4145
728	-263.346	-62.9413	30.5397
729	-263.248	-62.9178	30.5633
730	-263.061	-62.8731	30.6079
731	-262.915	-62.8382	30.6429
732	-262.8	-62.8106	30.6705
733	-262.576	-62.7571	30.724
734	-262.305	-62.6925	30.7886
735	-262.171	-62.6604	30.8207
736	-262.151	-62.6557	30.8254
737	-261.696	-62.5469	30.9342
738	-261.659	-62.5381	30.9429
739	-261.634	-62.532	30.9491
740	-261.575	-62.5178	30.9632
741	-261.014	-62.3839	31.0972
742	-260.329	-62.2202	31.2608
743	-260.272	-62.2065	31.2746
744	-260.107	-62.1672	31.3139
745	-259.867	-62.1097	31.3714
746	-259.866	-62.1096	31.3715
747	-259.842	-62.1037	31.3774
748	-259.595	-62.0446	31.4364
749	-259.276	-61.9683	31.5127
750	-258.911	-61.8811	31.6
751	-258.809	-61.8568	31.6242
752	-258.78	-61.8499	31.6312
753	-258.707	-61.8326	31.6485
754	-258.632	-61.8145	31.6666
755	-258.5	-61.783	31.698
756	-258.444	-61.7696	31.7114
757	-258.335	-61.7436	31.7374
758	-257.861	-61.6301	31.8509
759	-257.837	-61.6244	31.8566
760	-257.806	-61.6171	31.864
761	-257.659	-61.582	31.899
762	-257.502	-61.5444	31.9367
763	-257.48	-61.5391	31.9419
764	-257.29	-61.4939	31.9872
765	-256.857	-61.3903	32.0908
766	-256.733	-61.3607	32.1203
767	-256.636	-61.3375	32.1436
768	-256.283	-61.2532	32.2279
769	-255.604	-61.0909	32.3902
770	-255.56	-61.0804	32.4007
771	-255.456	-61.0555	32.4255
772	-255.332	-61.0257	32.4553
773	-255.232	-61.002	32.4791
774	-255.194	-60.9929	32.4882
775	-255.048	-60.958	32.5231
776	-254.919	-60.9271	32.554
777	-254.669	-60.8674	32.6137
778	-254.461	-60.8177	32.6634
779	-254.33	-60.7863	32.6948
780	-254.059	-60.7216	32.7595
781	-254.023	-60.713	32.7681
782	-253.808	-60.6615	32.8196
783	-253.652	-60.6243	32.8567
784	-253.493	-60.5863	32.8948
785	-253.046	-60.4794	33.0016
786	-252.934	-60.4527	33.0283
787	-252.809	-60.4228	33.0583
788	-252.667	-60.3889	33.0922
789	-252.539	-60.3584	33.1227
790	-252.525	-60.355	33.1261
791	-252.487	-60.3458	33.1353
792	-251.982	-60.225	33.256
793	-251.801	-60.1819	33.2992
794	-251.549	-60.1216	33.3595
795	-251.329	-60.0692	33.4119
796	-250.797	-59.9418	33.5392
797	-250.66	-59.9092	33.5719
798	-250.576	-59.8891	33.592
799	-250.374	-59.8408	33.6402
800	-250.074	-59.7691	33.7119
801	-249.695	-59.6785	33.8026
802	-249.503	-59.6327	33.8484
803	-249.432	-59.6157	33.8654
804	-248.895	-59.4873	33.9938
805	-248.683	-59.4366	34.0445
806	-248.66	-59.4312	34.0499
807	-248.458	-59.383	34.0981
808	-248.32	-59.3499	34.1312
809	-247.979	-59.2685	34.2126
810	-247.468	-59.1463	34.3348
811	-247.435	-59.1384	34.3426
812	-247.243	-59.0925	34.3886
813	-247.127	-59.0648	34.4163
814	-246.748	-58.9743	34.5068
815	-246.638	-58.948	34.5331
816	-246.6	-58.9387	34.5424
817	-246.225	-58.8492	34.6319
818	-245.93	-58.7787	34.7024
819	-245.802	-58.7482	34.7329
820	-245.712	-58.7265	34.7546
821	-245.002	-58.5568	34.9242
822	-244.802	-58.5091	34.972
823	-244.773	-58.502	34.979
824	-244.643	-58.471	35.01
825	-244.514	-58.4402	35.0409
826	-244.48	-58.4321	35.049
827	-244.192	-58.3632	35.1179
828	-243.988	-58.3145	35.1665
829	-243.777	-58.2641	35.217
830	-243.172	-58.1194	35.3617
831	-243.039	-58.0877	35.3934
832	-242.784	-58.0268	35.4542
833	-242.519	-57.9635	35.5176
834	-242.328	-57.9179	35.5632
835	-242.218	-57.8914	35.5897
836	-241.819	-57.7961	35.685
837	-241.766	-57.7835	35.6976
838	-241.75	-57.7796	35.7015
839	-241.696	-57.7668	35.7143
840	-240.746	-57.5397	35.9414
841	-240.674	-57.5224	35.9587
842	-240.6	-57.5047	35.9764
843	-240.47	-57.4738	36.0073
844	-240.363	-57.448	36.033
845	-240.183	-57.405	36.0761
846	-239.196	-57.1692	36.3118
847	-239.016	-57.1263	36.3548
848	-238.158	-56.9212	36.5598
849	-238.137	-56.9161	36.565
850	-237.522	-56.7691	36.712
851	-237.233	-56.7	36.781
852	-237.121	-56.6732	36.8078
853	-236.995	-56.6433	36.8378
854	-236.744	-56.5831	36.898
855	-236.353	-56.4897	36.9913
856	-235.823	-56.3631	37.118
857	-235.069	-56.1829	37.2982
858	-234.594	-56.0693	37.4118
859	-234.445	-56.0338	37.4473
860	-234.281	-55.9945	37.4866
861	-234.212	-55.9781	37.503
862	-234.027	-55.9338	37.5473
863	-233.122	-55.7174	37.7636
864	-232.975	-55.6823	37.7987
865	-232.811	-55.6432	37.8379
866	-232.734	-55.6247	37.8563
867	-231.904	-55.4265	38.0546
868	-231.444	-55.3165	38.1646
869	-231.368	-55.2984	38.1827
870	-230.724	-55.1444	38.3367
871	-230.043	-54.9816	38.4994
872	-230.029	-54.9782	38.5029
873	-229.141	-54.7661	38.715
874	-228.904	-54.7093	38.7717
875	-228.894	-54.7069	38.7742
876	-228.175	-54.5351	38.946
877	-228.147	-54.5285	38.9526
878	-227.898	-54.469	39.0121
879	-226.332	-54.0946	39.3865
880	-226.096	-54.0383	39.4428
881	-225.911	-53.9941	39.487
882	-225.353	-53.8606	39.6205
883	-224.94	-53.762	39.7191
884	-224.546	-53.6677	39.8134
885	-224.089	-53.5584	39.9226
886	-223.897	-53.5126	39.9685
887	-223.772	-53.4828	39.9983
888	-223.771	-53.4826	39.9984
889	-223.478	-53.4126	40.0685
890	-223.31	-53.3725	40.1086
891	-222.059	-53.0734	40.4077
892	-221.877	-53.0299	40.4512
893	-221.823	-53.0169	40.4641
894	-221.684	-52.9838	40.4972
895	-221.571	-52.9567	40.5244
896	-220.538	-52.7098	40.7712
897	-220.484	-52.6969	40.7841
898	-220.159	-52.6192	40.8619
899	-219.866	-52.5491	40.9319
900	-218.406	-52.2002	41.2809
901	-216.729	-51.7995	41.6815
902	-213.764	-51.0909	42.3902
903	-213.205	-50.9573	42.5238
904	-212.024	-50.675	42.8061
905	-211.904	-50.6463	42.8348
906	-211.837	-50.6302	42.8509
907	-211.789	-50.6187	42.8624
908	-211.705	-50.5988	42.8823
909	-210.437	-50.2956	43.1855
910	-208.904	-49.9291	43.5519
911	-204.085	-48.7774	44.7036
912	-203.305	-48.5912	44.8899
913	-196.379	-46.9357	46.5454
914	-196.143	-46.8792	46.6018
915	-196.005	-46.8463	46.6348
916	-195.798	-46.7969	46.6841
917	-195.648	-46.761	46.72
918	-194.765	-46.55	46.9311
919	-194.708	-46.5362	46.9448
920	-192.975	-46.122	47.359
921	-192.884	-46.1004	47.3807
922	-191.898	-45.8647	47.6164
923	-190.803	-45.6029	47.8782
924	-189.148	-45.2074	48.2737
925	-188.445	-45.0394	48.4417
926	-187.544	-44.8242	48.6569
927	-186.934	-44.6782	48.8029
928	-186.619	-44.6029	48.8782
929	-186.079	-44.474	49.0071
930	-181.866	-43.4671	50.014
931	-180.085	-43.0415	50.4396
		0	93.4811
		0	93.4811
		0	93.4811
		0	93.4811
		0	93.4811
		0	93.4811
		0	93.4811
		0	93.4811
		0	93.4811
		0	93.4811
		0	93.4811
		0	93.4811
		0	93.4811
		0	93.4811
		0	93.4811
		0	93.4811
		0	93.4811
		0	93.4811
		0	93.4811
		0	93.4811
		0	93.4811
		0	93.4811
		0	93.4811
		0	93.4811
		0	93.4811
		0	93.4811
		0	93.4811
		0	93.4811
		0	93.4811
		0	93.4811
		0	93.4811
		0	93.4811
		0	93.4811
		0	93.4811
		0	93.4811
		0	93.4811
		0	93.4811
		0	93.4811
		0	93.4811
		0	93.4811
		0	93.4811
		0	93.4811
		0	93.4811
		0	93.4811
		0	93.4811
		0	93.4811
		0	93.4811
		0	93.4811
		0	93.4811
		0	93.4811
		0	93.4811
		0	93.4811
		0	93.4811
		0	93.4811
		0	93.4811
		0	93.4811
		0	93.4811
		0	93.4811
		0	93.4811
		0	93.4811
		0	93.4811
		0	93.4811
		0	93.4811
		0	93.4811
		0	93.4811
		0	93.4811
		0	93.4811
		0	93.4811
		0	93.4811
		0	93.4811
		0	93.4811
		0	93.4811
		0	93.4811
		0	93.4811
		0	93.4811
		0	93.4811
		0	93.4811
		0	93.4811
		0	93.4811
		0	93.4811
		0	93.4811
		0	93.4811
		0	93.4811
		0	93.4811
		0	93.4811
		0	93.4811
		0	93.4811
		0	93.4811
		0	93.4811
		0	93.4811
		0	93.4811
		0	93.4811
		0	93.4811
		0	93.4811
		0	93.4811
		0	93.4811
		0	93.4811
		0	93.4811
		0	93.4811
		0	93.4811
		0	93.4811
		0	93.4811
		0	93.4811
		0	93.4811
		0	93.4811
		0	93.4811
		0	93.4811
		0	93.4811
		0	93.4811
		0	93.4811
		0	93.4811
		0	93.4811
		0	93.4811
		0	93.4811
		0	93.4811
		0	93.4811
		0	93.4811
		0	93.4811
		0	93.4811
		0	93.4811
		0	93.4811
		0	93.4811
		0	93.4811
		0	93.4811
		0	93.4811
		0	93.4811
		0	93.4811
		0	93.4811
		0	93.4811
		0	93.4811
		0	93.4811
		0	93.4811
		0	93.4811
		0	93.4811
		0	93.4811
		0	93.4811
		0	93.4811
		0	93.4811
		0	93.4811
		0	93.4811
		0	93.4811
		0	93.4811
		0	93.4811
		0	93.4811
		0	93.4811
		0	93.4811
		0	93.4811
		0	93.4811
		0	93.4811
		0	93.4811
		0	93.4811
		0	93.4811
		0	93.4811
		0	93.4811
		0	93.4811
		0	93.4811
		0	93.4811
		0	93.4811
		0	93.4811
		0	93.4811
		0	93.4811
		0	93.4811
		0	93.4811
		0	93.4811
		0	93.4811
		0	93.4811
		0	93.4811
		0	93.4811
		0	93.4811
		0	93.4811
		0	93.4811
		0	93.4811
		0	93.4811
		0	93.4811
		0	93.4811
		0	93.4811
		0	93.4811
		0	93.4811
		0	93.4811
		0	93.4811
		0	93.4811
		0	93.4811
		0	93.4811
		0	93.4811
		0	93.4811
		0	93.4811
		0	93.4811
		0	93.4811
		0	93.4811
		0	93.4811
		0	93.4811
		0	93.4811
		0	93.4811
		0	93.4811
		0	93.4811
		0	93.4811
		0	93.4811
		0	93.4811
		0	93.4811
		0	93.4811
		0	93.4811
		0	93.4811
		0	93.4811
		0	93.4811
		0	93.4811
		0	93.4811
		0	93.4811
		0	93.4811
		0	93.4811
		0	93.4811
		0	93.4811
		0	93.4811
		0	93.4811
		0	93.4811
		0	93.4811
		0	93.4811
		0	93.4811
		0	93.4811
		0	93.4811
		0	93.4811
		0	93.4811
		0	93.4811
		0	93.4811
		0	93.4811
		0	93.4811
		0	93.4811
		0	93.4811
		0	93.4811
		0	93.4811
		0	93.4811
		0	93.4811
		0	93.4811
		0	93.4811
		0	93.4811
		0	93.4811
		0	93.4811
		0	93.4811
		0	93.4811
		0	93.4811
		0	93.4811
		0	93.4811
		0	93.4811
		0	93.4811
		0	93.4811
		0	93.4811
		0	93.4811
		0	93.4811
		0	93.4811
		0	93.4811
		0	93.4811
		0	93.4811
		0	93.4811
		0	93.4811
		0	93.4811
		0	93.4811
		0	93.4811
		0	93.4811
		0	93.4811
		0	93.4811
		0	93.4811
		0	93.4811
		0	93.4811
		0	93.4811
		0	93.4811
		0	93.4811
		0	93.4811
		0	93.4811
		0	93.4811
		0	93.4811
		0	93.4811
		0	93.4811
		0	93.4811
		0	93.4811
		0	93.4811
		0	93.4811
		0	93.4811
		0	93.4811
		0	93.4811
		0	93.4811
		0	93.4811
		0	93.4811
		0	93.4811
		0	93.4811
		0	93.4811
		0	93.4811
		0	93.4811
		0	93.4811
		0	93.4811
		0	93.4811
		0	93.4811
		0	93.4811
		0	93.4811
		0	93.4811
		0	93.4811
		0	93.4811
		0	93.4811
		0	93.4811
		0	93.4811
		0	93.4811
		0	93.4811
		0	93.4811
		0	93.4811
		0	93.4811
		0	93.4811
		0	93.4811
		0	93.4811
		0	93.4811
		0	93.4811
		0	93.4811
		0	93.4811
		0	93.4811
		0	93.4811
		0	93.4811
		0	93.4811
		0	93.4811
		0	93.4811
		0	93.4811
		0	93.4811
		0	93.4811
		0	93.4811
		0	93.4811
		0	93.4811
		0	93.4811
		0	93.4811
		0	93.4811
		0	93.4811
		0	93.4811
		0	93.4811
		0	93.4811
		0	93.4811
		0	93.4811
		0	93.4811
		0	93.4811
		0	93.4811
		0	93.4811
		0	93.4811
		0	93.4811
		0	93.4811
		0	93.4811
		0	93.4811
		0	93.4811
		0	93.4811
		0	93.4811
		0	93.4811
		0	93.4811
		0	93.4811
		0	93.4811
		0	93.4811
		0	93.4811
		0	93.4811
		0	93.4811
		0	93.4811
		0	93.4811
		0	93.4811
		0	93.4811
		0	93.4811
		0	93.4811
		0	93.4811
		0	93.4811
		0	93.4811
		0	93.4811
		0	93.4811
		0	93.4811
		0	93.4811
		0	93.4811
		0	93.4811
		0	93.4811
		0	93.4811
		0	93.4811
		0	93.4811
		0	93.4811
		0	93.4811
		0	93.4811
		0	93.4811
		0	93.4811
		0	93.4811
		0	93.4811
		0	93.4811
		0	93.4811
		0	93.4811
		0	93.4811
		0	93.4811
		0	93.4811
		0	93.4811
		0	93.4811
		0	93.4811
		0	93.4811
		0	93.4811
		0	93.4811
		0	93.4811
		0	93.4811
		0	93.4811
		0	93.4811
		0	93.4811
		0	93.4811
		0	93.4811
		0	93.4811
		0	93.4811
		0	93.4811
		0	93.4811
		0	93.4811
		0	93.4811
		0	93.4811

## Sheet: Half
Conf #	E (kJ)	E(kcal)	Rel E (kcal)
1	-408.931	-97.7369	0
2	-407.085	-97.2957	0.441157
3	-406.705	-97.2048	0.532027
4	-406.258	-97.0979	0.638958
5	-406.13	-97.0673	0.669551
6	-403.485	-96.4353	1.3016
7	-402.926	-96.3016	1.43523
8	-402.576	-96.218	1.51881
9	-402.246	-96.1392	1.59768
10	-402.123	-96.1096	1.62727
11	-401.581	-95.9802	1.75669
12	-401.163	-95.8803	1.8566
13	-401.029	-95.8482	1.88867
14	-400.894	-95.8159	1.92096
15	-400.556	-95.7353	2.0016
16	-400.243	-95.6604	2.07648
17	-399.083	-95.3832	2.35368
18	-398.519	-95.2482	2.48862
19	-398.485	-95.2401	2.49673
20	-397.945	-95.1111	2.62572
21	-397.636	-95.0373	2.69959
22	-397.587	-95.0255	2.7113
23	-396.766	-94.8293	2.90758
24	-396.749	-94.8252	2.91166
25	-396.227	-94.7005	3.0363
26	-396.004	-94.6473	3.08958
27	-395.709	-94.5767	3.16016
28	-395.478	-94.5215	3.21534
29	-395.367	-94.4949	3.24197
30	-394.705	-94.3367	3.40017
31	-394.449	-94.2755	3.4614
32	-394.283	-94.2358	3.50105
33	-393.971	-94.1612	3.57565
34	-393.842	-94.1305	3.60636
35	-393.812	-94.1233	3.61358
36	-393.551	-94.0611	3.67579
37	-392.481	-93.8052	3.93162
38	-392.451	-93.7979	3.93891
39	-391.979	-93.6853	4.05155
40	-391.579	-93.5896	4.14723
41	-391.552	-93.5832	4.1537
42	-391.522	-93.576	4.16087
43	-391.499	-93.5705	4.16637
44	-390.448	-93.3194	4.41747
45	-390.237	-93.269	4.4679
46	-390.178	-93.2547	4.48217
47	-390.028	-93.219	4.51785
48	-389.841	-93.1742	4.56267
49	-389.506	-93.0943	4.64259
50	-389.465	-93.0844	4.65246
51	-388.869	-92.9418	4.795
52	-388.658	-92.8915	4.84532
53	-387.922	-92.7156	5.0213
54	-387.917	-92.7144	5.02244
55	-387.291	-92.5648	5.17208
56	-387.219	-92.5475	5.18934
57	-387.121	-92.5241	5.21274
58	-386.518	-92.38	5.35688
59	-386.07	-92.2729	5.46396
60	-385.834	-92.2166	5.52027
61	-385.787	-92.2053	5.5316
62	-385.649	-92.1723	5.56453
63	-385.415	-92.1164	5.62046
64	-385.205	-92.0663	5.6706
65	-385.046	-92.0282	5.70863
66	-385.043	-92.0276	5.70927
67	-384.97	-92.01	5.72689
68	-384.935	-92.0016	5.73525
69	-384.887	-91.9902	5.74663
70	-384.472	-91.8909	5.84591
71	-383.26	-91.6012	6.13564
72	-382.353	-91.3847	6.35217
73	-382.226	-91.3542	6.38267
74	-382.215	-91.3516	6.3853
75	-381.794	-91.2509	6.48592
76	-381.099	-91.0849	6.65196
77	-380.879	-91.0322	6.70464
78	-380.712	-90.9924	6.74448
79	-380.366	-90.9097	6.82717
80	-380.307	-90.8956	6.8413
81	-379.832	-90.782	6.9549
82	-379.771	-90.7675	6.96936
83	-379.57	-90.7195	7.01733
84	-379.563	-90.7177	7.01914
85	-379.291	-90.6527	7.08415
86	-379.183	-90.6268	7.11004
87	-378.538	-90.4729	7.26398
88	-378.493	-90.4619	7.27493
89	-378.408	-90.4418	7.2951
90	-378.249	-90.4036	7.33327
91	-377.998	-90.3437	7.39319
92	-377.665	-90.264	7.47283
93	-377.5	-90.2246	7.51221
94	-377.425	-90.2068	7.53007
95	-377.108	-90.1311	7.60576
96	-377.018	-90.1094	7.62749
97	-376.574	-90.0034	7.73348
98	-376.419	-89.9664	7.77048
99	-376.326	-89.9441	7.79273
100	-376.065	-89.8816	7.85528
101	-375.828	-89.825	7.91183
102	-375.827	-89.8248	7.91207
103	-375.405	-89.7239	8.01291
104	-375.352	-89.7112	8.02562
105	-375.072	-89.6444	8.09242
106	-374.941	-89.6131	8.12376
107	-374.699	-89.5553	8.1816
108	-374.656	-89.5449	8.19192
109	-374.546	-89.5187	8.21812
110	-374.497	-89.507	8.22985
111	-374.183	-89.4319	8.30497
112	-374.178	-89.4307	8.30619
113	-373.992	-89.3862	8.35065
114	-373.965	-89.3798	8.35707
115	-373.961	-89.3787	8.35815
116	-373.63	-89.2997	8.43712
117	-373.245	-89.2077	8.52911
118	-373.084	-89.1691	8.56776
119	-372.974	-89.143	8.59386
120	-372.923	-89.1308	8.60607
121	-372.827	-89.1079	8.62894
122	-372.584	-89.0497	8.68719
123	-371.859	-88.8764	8.86042
124	-371.643	-88.8247	8.91212
125	-371.629	-88.8214	8.91546
126	-371.591	-88.8124	8.92443
127	-371.478	-88.7853	8.95158
128	-371.373	-88.7604	8.97646
129	-371.304	-88.7439	8.99297
130	-371.298	-88.7422	8.99462
131	-371.289	-88.7403	8.99658
132	-371.271	-88.7359	9.001
133	-371.212	-88.7218	9.01506
134	-371.062	-88.686	9.05086
135	-370.655	-88.5887	9.14816
136	-370.265	-88.4954	9.24144
137	-370.174	-88.4736	9.26324
138	-370.133	-88.4639	9.27292
139	-370.042	-88.4422	9.29469
140	-370.039	-88.4414	9.29543
141	-369.86	-88.3985	9.33831
142	-369.835	-88.3928	9.34407
143	-369.833	-88.3922	9.34467
144	-369.814	-88.3876	9.34928
145	-369.771	-88.3775	9.35937
146	-369.686	-88.3571	9.3798
147	-369.679	-88.3553	9.38155
148	-369.669	-88.353	9.38389
149	-369.666	-88.3524	9.38446
150	-369.542	-88.3227	9.41413
151	-369.444	-88.2993	9.43755
152	-369.384	-88.2849	9.45194
153	-369.349	-88.2765	9.46037
154	-369.245	-88.2516	9.48523
155	-369.241	-88.2507	9.48616
156	-368.914	-88.1726	9.56427
157	-368.724	-88.1273	9.60958
158	-368.664	-88.1128	9.62402
159	-368.536	-88.0821	9.65473
160	-368.488	-88.0708	9.66604
161	-368.465	-88.0653	9.67156
162	-368.428	-88.0564	9.68045
163	-368.391	-88.0476	9.68927
164	-368.381	-88.0453	9.69159
165	-368.317	-88.03	9.70686
166	-368.298	-88.0253	9.71154
167	-368.117	-87.982	9.75488
168	-368.043	-87.9643	9.77251
169	-367.935	-87.9387	9.79818
170	-367.762	-87.8973	9.8396
171	-367.153	-87.7516	9.98521
172	-367.139	-87.7484	9.9885
173	-367.062	-87.7299	10.007
174	-367.06	-87.7293	10.0075
175	-366.985	-87.7116	10.0253
176	-366.972	-87.7083	10.0285
177	-366.879	-87.6862	10.0506
178	-366.686	-87.6402	10.0967
179	-366.654	-87.6324	10.1045
180	-366.475	-87.5897	10.1471
181	-366.451	-87.5839	10.1529
182	-366.272	-87.541	10.1959
183	-366.161	-87.5145	10.2224
184	-365.966	-87.468	10.2688
185	-365.764	-87.4198	10.3171
186	-365.735	-87.4128	10.3241
187	-365.606	-87.3818	10.355
188	-365.498	-87.3561	10.3808
189	-365.302	-87.3093	10.4275
190	-364.743	-87.1755	10.5613
191	-364.635	-87.15	10.5869
192	-364.57	-87.1344	10.6025
193	-364.557	-87.1313	10.6056
194	-364.128	-87.0288	10.7081
195	-364.112	-87.0248	10.712
196	-364.106	-87.0235	10.7134
197	-364.076	-87.0162	10.7207
198	-364.019	-87.0026	10.7342
199	-363.878	-86.9689	10.768
200	-363.835	-86.9586	10.7783
201	-363.66	-86.9168	10.8201
202	-363.56	-86.8928	10.844
203	-363.551	-86.8909	10.846
204	-363.536	-86.8872	10.8496
205	-363.441	-86.8644	10.8724
206	-363.376	-86.8489	10.8879
207	-363.333	-86.8386	10.8982
208	-363.286	-86.8275	10.9094
209	-363.217	-86.8109	10.9259
210	-363.101	-86.7832	10.9537
211	-363.087	-86.78	10.9569
212	-363.001	-86.7592	10.9776
213	-362.721	-86.6925	11.0444
214	-362.654	-86.6764	11.0605
215	-362.396	-86.6147	11.1221
216	-362.346	-86.6027	11.1341
217	-362.274	-86.5855	11.1514
218	-361.853	-86.4849	11.2519
219	-361.76	-86.4627	11.2741
220	-361.633	-86.4325	11.3044
221	-361.464	-86.392	11.3449
222	-361.403	-86.3773	11.3595
223	-361.302	-86.3533	11.3835
224	-361.197	-86.3282	11.4087
225	-361	-86.2812	11.4557
226	-360.87	-86.25	11.4868
227	-360.791	-86.231	11.5058
228	-360.594	-86.1841	11.5528
229	-360.115	-86.0694	11.6674
230	-360.076	-86.0603	11.6765
231	-359.956	-86.0315	11.7053
232	-359.851	-86.0064	11.7305
233	-359.575	-85.9406	11.7963
234	-359.372	-85.8919	11.845
235	-359.15	-85.8389	11.8979
236	-359.144	-85.8375	11.8993
237	-358.884	-85.7753	11.9616
238	-358.588	-85.7046	12.0322
239	-358.588	-85.7045	12.0323
240	-358.561	-85.698	12.0388
241	-358.491	-85.6815	12.0554
242	-358.464	-85.6748	12.062
243	-358.22	-85.6167	12.1202
244	-358.21	-85.6143	12.1225
245	-358.157	-85.6016	12.1353
246	-358.144	-85.5985	12.1384
247	-358.061	-85.5787	12.1582
248	-358.017	-85.568	12.1688
249	-358.011	-85.5668	12.1701
250	-357.868	-85.5326	12.2043
251	-357.752	-85.5047	12.2321
252	-357.711	-85.495	12.2418
253	-357.682	-85.4879	12.2489
254	-357.67	-85.4853	12.2516
255	-357.661	-85.4831	12.2538
256	-357.357	-85.4104	12.3265
257	-357.322	-85.402	12.3348
258	-357.208	-85.3747	12.3622
259	-357.105	-85.3501	12.3868
260	-357.092	-85.347	12.3899
261	-356.971	-85.3182	12.4186
262	-356.788	-85.2745	12.4624
263	-356.726	-85.2596	12.4772
264	-356.712	-85.2562	12.4807
265	-356.572	-85.2228	12.514
266	-356.423	-85.1872	12.5497
267	-356.414	-85.185	12.5519
268	-356.4	-85.1816	12.5553
269	-356.342	-85.1679	12.569
270	-356.24	-85.1433	12.5935
271	-356.169	-85.1265	12.6103
272	-355.99	-85.0836	12.6533
273	-355.756	-85.0278	12.709
274	-355.691	-85.0121	12.7248
275	-355.603	-84.9913	12.7456
276	-355.474	-84.9602	12.7766
277	-355.414	-84.946	12.7909
278	-355.208	-84.8968	12.8401
279	-355.088	-84.8681	12.8688
280	-354.867	-84.8152	12.9217
281	-354.695	-84.7742	12.9627
282	-354.689	-84.7726	12.9642
283	-354.683	-84.7713	12.9656
284	-354.618	-84.7558	12.9811
285	-354.395	-84.7025	13.0344
286	-354.384	-84.6998	13.0371
287	-354.186	-84.6526	13.0843
288	-354.128	-84.6387	13.0982
289	-354.072	-84.6252	13.1117
290	-353.955	-84.5972	13.1397
291	-353.88	-84.5795	13.1574
292	-353.833	-84.5681	13.1687
293	-353.354	-84.4537	13.2832
294	-353.351	-84.4529	13.284
295	-353.125	-84.3989	13.338
296	-353.111	-84.3956	13.3413
297	-352.906	-84.3465	13.3904
298	-352.878	-84.3398	13.397
299	-352.878	-84.3398	13.397
300	-352.838	-84.3304	13.4065
301	-352.765	-84.3128	13.424
302	-352.712	-84.3001	13.4368
303	-352.699	-84.2971	13.4397
304	-352.386	-84.2223	13.5146
305	-352.31	-84.2042	13.5327
306	-352.227	-84.1842	13.5526
307	-351.957	-84.1198	13.617
308	-351.809	-84.0843	13.6526
309	-351.77	-84.075	13.6619
310	-351.676	-84.0526	13.6842
311	-351.526	-84.0167	13.7202
312	-351.365	-83.9783	13.7586
313	-351.136	-83.9236	13.8132
314	-351.104	-83.9159	13.8209
315	-350.956	-83.8806	13.8563
316	-350.916	-83.8708	13.866
317	-350.891	-83.8651	13.8718
318	-350.889	-83.8645	13.8724
319	-350.88	-83.8625	13.8744
320	-350.688	-83.8164	13.9205
321	-350.68	-83.8146	13.9222
322	-350.635	-83.8038	13.933
323	-350.591	-83.7934	13.9435
324	-350.525	-83.7776	13.9593
325	-350.35	-83.7357	14.0011
326	-350.312	-83.7267	14.0102
327	-350.238	-83.7089	14.0279
328	-350.177	-83.6942	14.0426
329	-350.008	-83.654	14.0829
330	-349.972	-83.6454	14.0914
331	-349.96	-83.6425	14.0943
332	-349.421	-83.5136	14.2233
333	-349.375	-83.5027	14.2341
334	-349.312	-83.4875	14.2494
335	-349.237	-83.4696	14.2673
336	-349.093	-83.4353	14.3015
337	-349.041	-83.4228	14.3141
338	-348.882	-83.3849	14.352
339	-348.875	-83.383	14.3538
340	-348.767	-83.3573	14.3795
341	-348.532	-83.3011	14.4358
342	-348.457	-83.2832	14.4537
343	-348.264	-83.2371	14.4997
344	-348.207	-83.2234	14.5134
345	-347.991	-83.1718	14.5651
346	-347.962	-83.1648	14.5721
347	-347.785	-83.1227	14.6141
348	-347.328	-83.0135	14.7234
349	-347.248	-82.9943	14.7426
350	-347.227	-82.9893	14.7476
351	-347.185	-82.9791	14.7578
352	-347.18	-82.978	14.7589
353	-347.178	-82.9774	14.7594
354	-347.17	-82.9756	14.7613
355	-346.96	-82.9255	14.8114
356	-346.855	-82.9003	14.8365
357	-346.825	-82.8933	14.8436
358	-346.747	-82.8744	14.8624
359	-346.742	-82.8733	14.8636
360	-346.668	-82.8555	14.8813
361	-346.454	-82.8044	14.9324
362	-346.189	-82.7412	14.9957
363	-346.055	-82.7092	15.0277
364	-346.013	-82.699	15.0378
365	-346.011	-82.6986	15.0383
366	-345.939	-82.6814	15.0554
367	-345.931	-82.6796	15.0573
368	-345.91	-82.6745	15.0624
369	-345.904	-82.6729	15.0639
370	-345.811	-82.6509	15.0859
371	-345.769	-82.6408	15.0961
372	-345.738	-82.6335	15.1034
373	-345.679	-82.6193	15.1176
374	-345.531	-82.5838	15.153
375	-345.518	-82.5807	15.1561
376	-345.406	-82.5539	15.1829
377	-345.293	-82.527	15.2099
378	-345.28	-82.5239	15.213
379	-345.08	-82.4762	15.2607
380	-344.998	-82.4564	15.2804
381	-344.636	-82.37	15.3669
382	-344.582	-82.357	15.3799
383	-344.547	-82.3486	15.3882
384	-344.269	-82.2823	15.4546
385	-344.205	-82.267	15.4699
386	-343.82	-82.1749	15.562
387	-343.745	-82.157	15.5798
388	-343.741	-82.1562	15.5807
389	-343.53	-82.1056	15.6312
390	-343.445	-82.0854	15.6515
391	-343.348	-82.0622	15.6747
392	-343.338	-82.0597	15.6772
393	-343.332	-82.0582	15.6787
394	-343.315	-82.0544	15.6825
395	-343.184	-82.0229	15.7139
396	-343.097	-82.0021	15.7348
397	-342.939	-81.9643	15.7726
398	-342.844	-81.9416	15.7952
399	-342.716	-81.9112	15.8257
400	-342.56	-81.8738	15.863
401	-342.514	-81.8629	15.874
402	-342.468	-81.8518	15.8851
403	-342.446	-81.8466	15.8902
404	-342.327	-81.818	15.9188
405	-342.209	-81.7899	15.9469
406	-342.161	-81.7785	15.9584
407	-342.083	-81.7599	15.977
408	-342.053	-81.7527	15.9842
409	-342.047	-81.7511	15.9857
410	-342.015	-81.7435	15.9934
411	-341.955	-81.7293	16.0076
412	-341.938	-81.7252	16.0116
413	-341.694	-81.6669	16.07
414	-341.587	-81.6412	16.0956
415	-341.492	-81.6186	16.1182
416	-341.471	-81.6136	16.1232
417	-341.442	-81.6066	16.1302
418	-341.251	-81.561	16.1758
419	-341.184	-81.5448	16.192
420	-341.005	-81.5021	16.2347
421	-341.004	-81.5019	16.235
422	-340.963	-81.492	16.2448
423	-340.86	-81.4676	16.2693
424	-340.851	-81.4653	16.2715
425	-340.592	-81.4034	16.3334
426	-340.355	-81.3467	16.3902
427	-340.326	-81.3398	16.397
428	-340.238	-81.3188	16.4181
429	-340.163	-81.3009	16.436
430	-340.081	-81.2813	16.4556
431	-339.872	-81.2313	16.5055
432	-339.857	-81.2277	16.5092
433	-339.838	-81.2233	16.5136
434	-339.838	-81.2231	16.5137
435	-339.73	-81.1975	16.5393
436	-339.665	-81.1819	16.555
437	-339.652	-81.1787	16.5582
438	-339.624	-81.172	16.5649
439	-339.614	-81.1697	16.5672
440	-339.563	-81.1574	16.5794
441	-339.555	-81.1555	16.5813
442	-339.548	-81.1538	16.583
443	-339.495	-81.1413	16.5956
444	-339.388	-81.1156	16.6212
445	-339.19	-81.0684	16.6685
446	-339.146	-81.0577	16.6791
447	-339.131	-81.0542	16.6827
448	-339.121	-81.0518	16.6851
449	-339.118	-81.0511	16.6857
450	-339.1	-81.0468	16.69
451	-339.007	-81.0247	16.7122
452	-338.934	-81.0071	16.7297
453	-338.844	-80.9857	16.7512
454	-338.761	-80.9658	16.7711
455	-338.648	-80.9389	16.798
456	-338.58	-80.9227	16.8142
457	-338.291	-80.8535	16.8833
458	-338.259	-80.8458	16.8911
459	-338.231	-80.8391	16.8978
460	-337.983	-80.7798	16.9571
461	-337.945	-80.7708	16.966
462	-337.913	-80.763	16.9738
463	-337.822	-80.7414	16.9954
464	-337.745	-80.7229	17.014
465	-337.702	-80.7128	17.024
466	-337.698	-80.7118	17.0251
467	-337.696	-80.7114	17.0255
468	-337.688	-80.7094	17.0274
469	-337.679	-80.7073	17.0295
470	-337.664	-80.7038	17.0331
471	-337.64	-80.6979	17.0389
472	-337.552	-80.6768	17.0601
473	-337.377	-80.6349	17.1019
474	-337.214	-80.5961	17.1408
475	-337.149	-80.5805	17.1563
476	-336.994	-80.5435	17.1934
477	-336.967	-80.537	17.1999
478	-336.93	-80.5282	17.2086
479	-336.794	-80.4958	17.2411
480	-336.762	-80.4879	17.2489
481	-336.559	-80.4395	17.2973
482	-336.421	-80.4066	17.3302
483	-336.351	-80.3899	17.347
484	-336.09	-80.3275	17.4094
485	-335.895	-80.2809	17.456
486	-335.887	-80.2789	17.4579
487	-335.827	-80.2646	17.4723
488	-335.819	-80.2626	17.4743
489	-335.808	-80.2601	17.4768
490	-335.743	-80.2446	17.4923
491	-335.712	-80.2371	17.4997
492	-335.689	-80.2316	17.5052
493	-335.667	-80.2264	17.5104
494	-335.658	-80.2242	17.5126
495	-335.523	-80.1919	17.545
496	-335.486	-80.1832	17.5537
497	-335.464	-80.1777	17.5591
498	-335.459	-80.1765	17.5603
499	-335.451	-80.1748	17.562
500	-335.361	-80.1531	17.5837
501	-335.333	-80.1464	17.5904
502	-335.317	-80.1426	17.5943
503	-335.222	-80.1199	17.6169
504	-335.219	-80.1192	17.6176
505	-335.034	-80.0751	17.6617
506	-335.014	-80.0703	17.6666
507	-334.976	-80.0612	17.6757
508	-334.953	-80.0557	17.6811
509	-334.924	-80.0489	17.688
510	-334.889	-80.0403	17.6966
511	-334.864	-80.0343	17.7025
512	-334.812	-80.022	17.7148
513	-334.754	-80.0081	17.7288
514	-334.711	-79.9979	17.7389
515	-334.607	-79.973	17.7639
516	-334.519	-79.952	17.7848
517	-334.459	-79.9375	17.7993
518	-334.422	-79.9287	17.8082
519	-334.405	-79.9248	17.8121
520	-334.403	-79.9243	17.8126
521	-334.335	-79.9079	17.8289
522	-334.243	-79.886	17.8508
523	-334.003	-79.8286	17.9083
524	-333.987	-79.8248	17.9121
525	-333.978	-79.8227	17.9142
526	-333.931	-79.8115	17.9253
527	-333.889	-79.8013	17.9355
528	-333.781	-79.7755	17.9613
529	-333.777	-79.7746	17.9623
530	-333.76	-79.7704	17.9664
531	-333.752	-79.7685	17.9683
532	-333.723	-79.7617	17.9751
533	-333.697	-79.7556	17.9812
534	-333.642	-79.7424	17.9945
535	-333.636	-79.741	17.9958
536	-333.636	-79.7409	17.9959
537	-333.634	-79.7403	17.9965
538	-333.483	-79.7043	18.0325
539	-333.464	-79.6998	18.037
540	-333.341	-79.6705	18.0663
541	-333.314	-79.6639	18.073
542	-333.268	-79.653	18.0839
543	-333.235	-79.6451	18.0918
544	-333.224	-79.6425	18.0943
545	-333.189	-79.6342	18.1027
546	-333.154	-79.6258	18.111
547	-332.748	-79.5286	18.2083
548	-332.671	-79.5103	18.2265
549	-332.635	-79.5016	18.2353
550	-332.615	-79.4968	18.24
551	-332.579	-79.4882	18.2487
552	-332.546	-79.4805	18.2564
553	-332.503	-79.4702	18.2666
554	-332.494	-79.4679	18.269
555	-332.369	-79.4381	18.2987
556	-332.361	-79.4363	18.3006
557	-332.33	-79.4288	18.3081
558	-332.32	-79.4265	18.3104
559	-332.233	-79.4055	18.3314
560	-332.197	-79.397	18.3398
561	-332.011	-79.3526	18.3842
562	-332.01	-79.3523	18.3846
563	-331.956	-79.3394	18.3974
564	-331.863	-79.3171	18.4197
565	-331.757	-79.2917	18.4451
566	-331.749	-79.29	18.4469
567	-331.656	-79.2678	18.4691
568	-331.646	-79.2654	18.4715
569	-331.57	-79.2471	18.4897
570	-331.374	-79.2004	18.5365
571	-331.275	-79.1765	18.5603
572	-331.211	-79.1614	18.5755
573	-331.149	-79.1464	18.5904
574	-330.989	-79.1083	18.6285
575	-330.985	-79.1074	18.6295
576	-330.896	-79.086	18.6508
577	-330.874	-79.0807	18.6562
578	-330.838	-79.0723	18.6646
579	-330.792	-79.0612	18.6757
580	-330.738	-79.0483	18.6885
581	-330.701	-79.0395	18.6974
582	-330.673	-79.0327	18.7042
583	-330.588	-79.0124	18.7245
584	-330.558	-79.0053	18.7315
585	-330.553	-79.004	18.7329
586	-330.461	-78.982	18.7548
587	-330.24	-78.9293	18.8075
588	-330.209	-78.9217	18.8151
589	-330.19	-78.9174	18.8195
590	-330.121	-78.9008	18.836
591	-330.115	-78.8995	18.8374
592	-330.076	-78.89	18.8469
593	-330.061	-78.8865	18.8504
594	-329.951	-78.8601	18.8768
595	-329.923	-78.8536	18.8833
596	-329.902	-78.8485	18.8884
597	-329.819	-78.8286	18.9083
598	-329.773	-78.8177	18.9192
599	-329.759	-78.8142	18.9226
600	-329.697	-78.7995	18.9374
601	-329.677	-78.7947	18.9421
602	-329.677	-78.7946	18.9422
603	-329.671	-78.7933	18.9435
604	-329.554	-78.7652	18.9717
605	-329.449	-78.7402	18.9967
606	-329.329	-78.7115	19.0254
607	-329.184	-78.6769	19.06
608	-329.134	-78.665	19.0719
609	-329.117	-78.6609	19.0759
610	-329.114	-78.66	19.0768
611	-329.045	-78.6437	19.0931
612	-329.031	-78.6404	19.0965
613	-329.018	-78.6373	19.0996
614	-329.006	-78.6342	19.1026
615	-328.991	-78.6307	19.1061
616	-328.967	-78.625	19.1118
617	-328.962	-78.6238	19.113
618	-328.935	-78.6175	19.1194
619	-328.895	-78.6077	19.1291
620	-328.841	-78.5948	19.1421
621	-328.839	-78.5943	19.1425
622	-328.759	-78.5753	19.1615
623	-328.721	-78.5661	19.1707
624	-328.6	-78.5373	19.1996
625	-328.457	-78.503	19.2338
626	-328.388	-78.4867	19.2502
627	-328.37	-78.4824	19.2544
628	-328.26	-78.4559	19.281
629	-328.248	-78.453	19.2838
630	-328.06	-78.4082	19.3286
631	-327.853	-78.3587	19.3782
632	-327.788	-78.3432	19.3936
633	-327.766	-78.3379	19.399
634	-327.682	-78.3179	19.419
635	-327.555	-78.2875	19.4493
636	-327.44	-78.26	19.4769
637	-327.419	-78.255	19.4819
638	-327.326	-78.2328	19.5041
639	-327.123	-78.1843	19.5526
640	-327.094	-78.1773	19.5595
641	-327.082	-78.1745	19.5624
642	-327.044	-78.1654	19.5714
643	-326.876	-78.1252	19.6117
644	-326.867	-78.1231	19.6138
645	-326.745	-78.0938	19.643
646	-326.58	-78.0544	19.6824
647	-326.572	-78.0527	19.6842
648	-326.568	-78.0516	19.6853
649	-326.48	-78.0306	19.7062
650	-326.363	-78.0026	19.7343
651	-326.356	-78.001	19.7359
652	-326.348	-77.9989	19.7379
653	-326.329	-77.9946	19.7423
654	-326.221	-77.9688	19.768
655	-326.174	-77.9574	19.7795
656	-326.159	-77.9539	19.7829
657	-326.114	-77.943	19.7938
658	-326.026	-77.9222	19.8147
659	-325.937	-77.9009	19.836
660	-325.678	-77.8388	19.898
661	-325.643	-77.8306	19.9062
662	-325.564	-77.8117	19.9251
663	-325.559	-77.8104	19.9265
664	-325.419	-77.7771	19.9598
665	-325.399	-77.7723	19.9646
666	-325.151	-77.713	20.0238
667	-325.131	-77.7082	20.0286
668	-325.114	-77.7041	20.0327
669	-324.816	-77.6329	20.1039
670	-324.751	-77.6174	20.1194
671	-324.593	-77.5796	20.1573
672	-324.554	-77.5702	20.1666
673	-324.28	-77.5047	20.2322
674	-324.211	-77.4883	20.2485
675	-324.193	-77.4841	20.2527
676	-324.188	-77.4829	20.254
677	-324.086	-77.4584	20.2785
678	-324.073	-77.4553	20.2816
679	-323.873	-77.4076	20.3293
680	-323.862	-77.4048	20.3321
681	-323.83	-77.3972	20.3397
682	-323.744	-77.3767	20.3602
683	-323.46	-77.3089	20.428
684	-323.349	-77.2824	20.4545
685	-323.089	-77.2201	20.5167
686	-322.842	-77.161	20.5759
687	-322.828	-77.1577	20.5791
688	-322.689	-77.1245	20.6123
689	-322.678	-77.122	20.6148
690	-322.29	-77.0291	20.7077
691	-322.073	-76.9772	20.7597
692	-322.055	-76.973	20.7639
693	-321.847	-76.9233	20.8136
694	-321.822	-76.9174	20.8194
695	-321.816	-76.9158	20.8211
696	-321.812	-76.9149	20.822
697	-321.786	-76.9088	20.828
698	-321.738	-76.8972	20.8397
699	-321.486	-76.8371	20.8998
700	-321.435	-76.8247	20.9121
701	-321.413	-76.8197	20.9172
702	-321.351	-76.8047	20.9322
703	-321.345	-76.8034	20.9335
704	-320.91	-76.6994	21.0375
705	-320.834	-76.6812	21.0556
706	-320.784	-76.6692	21.0676
707	-320.746	-76.6602	21.0766
708	-320.664	-76.6406	21.0963
709	-320.656	-76.6386	21.0983
710	-320.426	-76.5837	21.1532
711	-320.364	-76.5689	21.1679
712	-320.348	-76.5649	21.1719
713	-320.304	-76.5546	21.1823
714	-320.303	-76.5542	21.1827
715	-320.2	-76.5296	21.2073
716	-320.098	-76.5052	21.2316
717	-320.075	-76.4997	21.2371
718	-320.018	-76.4861	21.2508
719	-320.007	-76.4835	21.2533
720	-319.906	-76.4594	21.2774
721	-319.685	-76.4066	21.3303
722	-319.372	-76.3318	21.405
723	-319.28	-76.3098	21.4271
724	-319.277	-76.309	21.4278
725	-319.224	-76.2963	21.4405
726	-319.061	-76.2573	21.4795
727	-319.033	-76.2506	21.4863
728	-318.833	-76.2028	21.534
729	-318.76	-76.1854	21.5514
730	-318.723	-76.1767	21.5602
731	-318.627	-76.1537	21.5832
732	-318.582	-76.143	21.5939
733	-318.579	-76.1421	21.5947
734	-318.459	-76.1136	21.6232
735	-318.421	-76.1045	21.6324
736	-318.29	-76.073	21.6638
737	-318.283	-76.0714	21.6654
738	-318.253	-76.0644	21.6724
739	-318.128	-76.0345	21.7024
740	-318.128	-76.0343	21.7025
741	-317.986	-76.0006	21.7363
742	-317.908	-75.9818	21.7551
743	-317.89	-75.9775	21.7594
744	-317.814	-75.9594	21.7774
745	-317.778	-75.9507	21.7862
746	-317.747	-75.9433	21.7935
747	-317.692	-75.9301	21.8067
748	-317.654	-75.921	21.8158
749	-317.652	-75.9208	21.8161
750	-317.604	-75.9092	21.8276
751	-317.581	-75.9037	21.8332
752	-317.52	-75.8891	21.8478
753	-317.5	-75.8843	21.8525
754	-317.483	-75.8804	21.8565
755	-317.26	-75.827	21.9099
756	-317.116	-75.7927	21.9442
757	-317.059	-75.7789	21.9579
758	-317.047	-75.7761	21.9607
759	-316.943	-75.7513	21.9855
760	-316.907	-75.7427	21.9942
761	-316.834	-75.7251	22.0117
762	-316.824	-75.7226	22.0142
763	-316.654	-75.6821	22.0547
764	-316.575	-75.6633	22.0735
765	-316.195	-75.5725	22.1643
766	-316.152	-75.5622	22.1746
767	-315.985	-75.5222	22.2146
768	-315.818	-75.4823	22.2546
769	-315.795	-75.4768	22.2601
770	-315.787	-75.4748	22.262
771	-315.697	-75.4533	22.2835
772	-315.631	-75.4376	22.2992
773	-315.622	-75.4354	22.3014
774	-315.572	-75.4236	22.3132
775	-315.386	-75.3791	22.3578
776	-315.282	-75.3543	22.3826
777	-315.234	-75.3427	22.3941
778	-315.129	-75.3177	22.4191
779	-315.107	-75.3123	22.4246
780	-314.986	-75.2834	22.4534
781	-314.974	-75.2806	22.4563
782	-314.813	-75.2421	22.4947
783	-314.778	-75.2337	22.5032
784	-314.743	-75.2255	22.5114
785	-314.632	-75.1989	22.5379
786	-314.62	-75.196	22.5408
787	-314.471	-75.1603	22.5766
788	-314.436	-75.152	22.5849
789	-314.396	-75.1424	22.5945
790	-314.165	-75.0873	22.6495
791	-313.791	-74.9978	22.739
792	-313.767	-74.9922	22.7446
793	-313.47	-74.9211	22.8158
794	-313.376	-74.8986	22.8382
795	-313.286	-74.877	22.8598
796	-313.254	-74.8695	22.8674
797	-313.11	-74.8352	22.9017
798	-313.008	-74.8107	22.9262
799	-312.877	-74.7794	22.9575
800	-312.876	-74.7791	22.9578
801	-312.811	-74.7637	22.9731
802	-312.798	-74.7605	22.9764
803	-312.769	-74.7535	22.9833
804	-312.765	-74.7527	22.9841
805	-312.587	-74.71	23.0268
806	-312.555	-74.7025	23.0343
807	-312.46	-74.6798	23.0571
808	-312.443	-74.6758	23.0611
809	-312.43	-74.6726	23.0642
810	-312.235	-74.6259	23.111
811	-311.968	-74.5621	23.1748
812	-311.739	-74.5075	23.2294
813	-311.712	-74.5011	23.2358
814	-311.402	-74.427	23.3099
815	-311.387	-74.4233	23.3136
816	-311.312	-74.4054	23.3315
817	-311.202	-74.3789	23.3579
818	-311.175	-74.3726	23.3643
819	-311.065	-74.3463	23.3906
820	-310.987	-74.3277	23.4092
821	-310.95	-74.3187	23.4181
822	-310.849	-74.2948	23.4421
823	-310.728	-74.2657	23.4711
824	-310.549	-74.223	23.5138
825	-310.39	-74.185	23.5518
826	-309.919	-74.0724	23.6645
827	-309.868	-74.0602	23.6767
828	-309.63	-74.0033	23.7336
829	-309.391	-73.9462	23.7907
830	-309.252	-73.913	23.8239
831	-308.961	-73.8434	23.8935
832	-308.904	-73.8298	23.9071
833	-308.829	-73.8119	23.925
834	-308.775	-73.7989	23.9379
835	-308.766	-73.7969	23.9399
836	-308.55	-73.7451	23.9918
837	-308.471	-73.7262	24.0106
838	-308.436	-73.718	24.0189
839	-308.21	-73.664	24.0729
840	-308.128	-73.6443	24.0926
841	-308.036	-73.6224	24.1145
842	-307.996	-73.6128	24.1241
843	-307.431	-73.4779	24.259
844	-307.369	-73.463	24.2738
845	-307.316	-73.4503	24.2866
846	-307.304	-73.4473	24.2895
847	-307.243	-73.4329	24.3039
848	-307.21	-73.425	24.3119
849	-307.132	-73.4063	24.3306
850	-306.906	-73.3523	24.3846
851	-306.579	-73.2743	24.4626
852	-306.466	-73.2471	24.4898
853	-306.304	-73.2083	24.5285
854	-306.15	-73.1717	24.5652
855	-306.079	-73.1545	24.5823
856	-305.984	-73.1319	24.605
857	-305.87	-73.1046	24.6323
858	-305.722	-73.0694	24.6674
859	-305.624	-73.0459	24.691
860	-305.599	-73.0399	24.697
861	-305.597	-73.0393	24.6975
862	-305.592	-73.0382	24.6986
863	-305.502	-73.0167	24.7201
864	-305.421	-72.9973	24.7395
865	-305.193	-72.9429	24.794
866	-305.117	-72.9246	24.8122
867	-305.064	-72.912	24.8248
868	-304.896	-72.8718	24.865
869	-304.893	-72.8711	24.8657
870	-304.853	-72.8616	24.8752
871	-304.816	-72.8527	24.8841
872	-304.69	-72.8227	24.9141
873	-304.677	-72.8196	24.9173
874	-304.636	-72.8097	24.9272
875	-304.581	-72.7966	24.9402
876	-304.457	-72.767	24.9699
877	-304.419	-72.7578	24.9791
878	-304.414	-72.7566	24.9802
879	-304.394	-72.752	24.9848
880	-304.38	-72.7487	24.9882
881	-304.346	-72.7404	24.9965
882	-304.322	-72.7348	25.002
883	-304.321	-72.7344	25.0025
884	-304.167	-72.6976	25.0393
885	-304.064	-72.6731	25.0638
886	-303.976	-72.6521	25.0848
887	-303.956	-72.6472	25.0897
888	-303.844	-72.6204	25.1165
889	-303.762	-72.6008	25.136
890	-303.755	-72.5992	25.1377
891	-303.707	-72.5878	25.1491
892	-303.697	-72.5854	25.1515
893	-303.683	-72.5821	25.1548
894	-303.616	-72.5661	25.1708
895	-303.517	-72.5424	25.1945
896	-303.514	-72.5415	25.1954
897	-303.442	-72.5243	25.2125
898	-303.277	-72.4849	25.2519
899	-303.06	-72.433	25.3039
900	-302.907	-72.3965	25.3403
901	-302.702	-72.3474	25.3895
902	-302.614	-72.3265	25.4103
903	-302.577	-72.3175	25.4193
904	-302.518	-72.3036	25.4332
905	-302.481	-72.2946	25.4422
906	-302.345	-72.2622	25.4746
907	-302.26	-72.2418	25.4951
908	-302.254	-72.2405	25.4963
909	-302.139	-72.2131	25.5238
910	-302.034	-72.1878	25.5491
911	-301.91	-72.1582	25.5786
912	-301.847	-72.1431	25.5937
913	-301.813	-72.1351	25.6017
914	-301.797	-72.1311	25.6057
915	-301.782	-72.1275	25.6093
916	-301.774	-72.1258	25.6111
917	-301.768	-72.1243	25.6125
918	-301.684	-72.1043	25.6326
919	-301.672	-72.1013	25.6356
920	-301.599	-72.0839	25.653
921	-301.473	-72.0538	25.683
922	-301.448	-72.0478	25.6891
923	-301.428	-72.0431	25.6937
924	-301.427	-72.0429	25.694
925	-301.404	-72.0372	25.6996
926	-301.249	-72.0002	25.7367
927	-301.195	-71.9874	25.7494
928	-301.172	-71.9818	25.755
929	-301.151	-71.9767	25.7602
930	-301.134	-71.9728	25.764
931	-301.132	-71.9724	25.7645
932	-301.079	-71.9595	25.7773
933	-301.003	-71.9413	25.7955
934	-300.977	-71.9351	25.8017
935	-300.91	-71.9193	25.8176
936	-300.896	-71.9158	25.821
937	-300.77	-71.8858	25.8511
938	-300.66	-71.8595	25.8774
939	-300.602	-71.8456	25.8913
940	-300.601	-71.8453	25.8916
941	-300.565	-71.8367	25.9002
942	-300.513	-71.8244	25.9124
943	-300.372	-71.7906	25.9462
944	-300.289	-71.7707	25.9661
945	-300.255	-71.7627	25.9741
946	-300.195	-71.7483	25.9886
947	-300.193	-71.7478	25.9891
948	-300.176	-71.7437	25.9931
949	-300.153	-71.7382	25.9987
950	-300.034	-71.7099	26.027
951	-299.965	-71.6934	26.0435
952	-299.895	-71.6766	26.0603
953	-299.843	-71.6641	26.0727
954	-299.41	-71.5607	26.1762
955	-299.39	-71.5559	26.1809
956	-299.369	-71.551	26.1859
957	-299.264	-71.5258	26.2111
958	-299.243	-71.5209	26.216
959	-299.215	-71.5141	26.2227
960	-299.119	-71.4911	26.2458
961	-299.107	-71.4884	26.2485
962	-299.051	-71.475	26.2619
963	-299.044	-71.4733	26.2636
964	-299.035	-71.471	26.2658
965	-298.99	-71.4604	26.2765
966	-298.967	-71.4547	26.2821
967	-298.827	-71.4214	26.3154
968	-298.767	-71.407	26.3299
969	-298.722	-71.3963	26.3406
970	-298.592	-71.3652	26.3717
971	-298.522	-71.3485	26.3883
972	-298.43	-71.3265	26.4103
973	-298.391	-71.3173	26.4196
974	-298.331	-71.3028	26.434
975	-298.042	-71.2337	26.5032
976	-298.019	-71.2283	26.5086
977	-298.011	-71.2263	26.5106
978	-297.978	-71.2184	26.5185
979	-297.886	-71.1964	26.5404
980	-297.852	-71.1882	26.5486
981	-297.618	-71.1324	26.6045
982	-297.573	-71.1217	26.6151
983	-297.52	-71.1089	26.6279
984	-297.466	-71.096	26.6409
985	-297.378	-71.0751	26.6617
986	-297.146	-71.0195	26.7174
987	-297.093	-71.0069	26.73
988	-297.051	-70.997	26.7399
989	-296.928	-70.9676	26.7692
990	-296.849	-70.9487	26.7882
991	-296.786	-70.9335	26.8033
992	-296.702	-70.9136	26.8233
993	-296.657	-70.9027	26.8342
994	-296.626	-70.8953	26.8416
995	-296.565	-70.8806	26.8562
996	-296.498	-70.8648	26.8721
997	-296.393	-70.8397	26.8972
998	-296.373	-70.8349	26.9019
999	-296.089	-70.7671	26.9698
1000	-296.047	-70.7569	26.9799
1001	-296.03	-70.7528	26.9841
1002	-296.001	-70.7459	26.991
1003	-295.996	-70.7447	26.9921
1004	-295.858	-70.7119	27.025
1005	-295.832	-70.7055	27.0313
1006	-295.816	-70.7018	27.0351
1007	-295.795	-70.6967	27.0402
1008	-295.757	-70.6877	27.0492
1009	-295.535	-70.6347	27.1022
1010	-295.527	-70.6326	27.1043
1011	-295.416	-70.6062	27.1306
1012	-295.276	-70.5728	27.1641
1013	-295.238	-70.5637	27.1732
1014	-295.019	-70.5111	27.2257
1015	-294.942	-70.4929	27.2439
1016	-294.888	-70.48	27.2568
1017	-294.865	-70.4745	27.2623
1018	-294.84	-70.4685	27.2683
1019	-294.638	-70.4202	27.3167
1020	-294.51	-70.3897	27.3472
1021	-294.501	-70.3874	27.3494
1022	-294.481	-70.3826	27.3543
1023	-294.406	-70.3647	27.3722
1024	-294.393	-70.3616	27.3753
1025	-294.237	-70.3242	27.4126
1026	-294.141	-70.3015	27.4354
1027	-294.077	-70.2861	27.4508
1028	-294.046	-70.2787	27.4581
1029	-293.93	-70.2511	27.4858
1030	-293.888	-70.2409	27.4959
1031	-293.803	-70.2205	27.5163
1032	-293.8	-70.2199	27.517
1033	-293.745	-70.2066	27.5302
1034	-293.7	-70.196	27.5409
1035	-293.697	-70.1952	27.5417
1036	-293.689	-70.1934	27.5435
1037	-293.659	-70.1862	27.5506
1038	-293.462	-70.1391	27.5978
1039	-293.437	-70.133	27.6038
1040	-293.433	-70.1323	27.6046
1041	-293.433	-70.1322	27.6046
1042	-293.413	-70.1275	27.6093
1043	-293.272	-70.0937	27.6431
1044	-293.129	-70.0595	27.6773
1045	-293.042	-70.0388	27.6981
1046	-292.929	-70.0118	27.725
1047	-292.764	-69.9722	27.7647
1048	-292.72	-69.9618	27.7751
1049	-292.605	-69.9343	27.8026
1050	-292.551	-69.9214	27.8154
1051	-292.453	-69.898	27.8388
1052	-292.447	-69.8964	27.8405
1053	-292.432	-69.8929	27.844
1054	-292.384	-69.8814	27.8555
1055	-292.37	-69.8782	27.8586
1056	-292.076	-69.8078	27.929
1057	-291.97	-69.7825	27.9543
1058	-291.573	-69.6876	28.0492
1059	-291.455	-69.6593	28.0775
1060	-291.32	-69.627	28.1098
1061	-291.293	-69.6207	28.1161
1062	-291.197	-69.5979	28.139
1063	-291.166	-69.5904	28.1465
1064	-291.16	-69.589	28.1478
1065	-291.09	-69.5722	28.1646
1066	-291.026	-69.5568	28.18
1067	-290.935	-69.5351	28.2017
1068	-290.861	-69.5175	28.2194
1069	-290.805	-69.5041	28.2328
1070	-290.765	-69.4945	28.2424
1071	-290.624	-69.4607	28.2761
1072	-290.596	-69.4541	28.2828
1073	-290.474	-69.425	28.3119
1074	-290.467	-69.4232	28.3136
1075	-290.431	-69.4147	28.3221
1076	-290.416	-69.4112	28.3257
1077	-290.414	-69.4106	28.3262
1078	-290.394	-69.406	28.3309
1079	-290.219	-69.3639	28.3729
1080	-290.195	-69.3582	28.3787
1081	-289.955	-69.301	28.4359
1082	-289.935	-69.2962	28.4407
1083	-289.923	-69.2933	28.4436
1084	-289.894	-69.2863	28.4506
1085	-289.863	-69.279	28.4579
1086	-289.858	-69.2778	28.459
1087	-289.663	-69.2312	28.5057
1088	-289.599	-69.2159	28.5209
1089	-289.5	-69.1921	28.5447
1090	-289.469	-69.1848	28.552
1091	-289.332	-69.1519	28.5849
1092	-289.206	-69.122	28.6149
1093	-289.108	-69.0984	28.6385
1094	-289.099	-69.0964	28.6404
1095	-289.043	-69.083	28.6538
1096	-288.925	-69.0548	28.6821
1097	-288.882	-69.0444	28.6924
1098	-288.724	-69.0068	28.73
1099	-288.716	-69.0048	28.732
1100	-288.64	-68.9866	28.7503
1101	-288.637	-68.9859	28.7509
1102	-288.555	-68.9663	28.7706
1103	-288.476	-68.9474	28.7894
1104	-288.309	-68.9075	28.8293
1105	-288.117	-68.8615	28.8753
1106	-287.994	-68.8323	28.9046
1107	-287.826	-68.7921	28.9448
1108	-287.821	-68.7908	28.946
1109	-287.691	-68.7597	28.9771
1110	-287.467	-68.7063	29.0306
1111	-287.441	-68.7	29.0368
1112	-287.341	-68.6761	29.0607
1113	-287.226	-68.6488	29.0881
1114	-287.21	-68.6447	29.0921
1115	-287.178	-68.6373	29.0996
1116	-287.026	-68.6008	29.1361
1117	-286.998	-68.5942	29.1426
1118	-286.919	-68.5754	29.1615
1119	-286.913	-68.5738	29.1631
1120	-286.874	-68.5646	29.1723
1121	-286.741	-68.5328	29.204
1122	-286.614	-68.5024	29.2345
1123	-286.407	-68.4528	29.284
1124	-286.39	-68.4489	29.2879
1125	-286.29	-68.425	29.3118
1126	-286.262	-68.4183	29.3185
1127	-286.257	-68.4171	29.3197
1128	-286.073	-68.3731	29.3638
1129	-285.865	-68.3233	29.4136
1130	-285.84	-68.3174	29.4194
1131	-285.731	-68.2914	29.4455
1132	-285.596	-68.2592	29.4777
1133	-285.572	-68.2533	29.4835
1134	-285.472	-68.2295	29.5074
1135	-285.357	-68.202	29.5349
1136	-285.254	-68.1774	29.5594
1137	-285.243	-68.1746	29.5622
1138	-284.988	-68.1138	29.623
1139	-284.81	-68.0712	29.6656
1140	-284.752	-68.0574	29.6794
1141	-284.691	-68.0429	29.694
1142	-284.658	-68.0349	29.7019
1143	-284.412	-67.976	29.7609
1144	-284.361	-67.964	29.7729
1145	-284.308	-67.9512	29.7856
1146	-284.262	-67.9403	29.7965
1147	-284.2	-67.9254	29.8114
1148	-284.02	-67.8824	29.8544
1149	-284.016	-67.8815	29.8553
1150	-283.982	-67.8734	29.8635
1151	-283.947	-67.865	29.8718
1152	-283.846	-67.8409	29.896
1153	-283.805	-67.831	29.9058
1154	-283.752	-67.8184	29.9185
1155	-283.705	-67.8072	29.9297
1156	-283.687	-67.8028	29.9341
1157	-283.666	-67.7977	29.9391
1158	-283.623	-67.7876	29.9492
1159	-283.519	-67.7626	29.9742
1160	-283.489	-67.7555	29.9813
1161	-283.468	-67.7504	29.9865
1162	-283.355	-67.7234	30.0134
1163	-283.326	-67.7166	30.0202
1164	-283.239	-67.6957	30.0412
1165	-283.054	-67.6516	30.0853
1166	-283.039	-67.6479	30.089
1167	-282.728	-67.5736	30.1632
1168	-282.484	-67.5154	30.2215
1169	-282.463	-67.5103	30.2266
1170	-282.345	-67.4821	30.2548
1171	-282.343	-67.4815	30.2553
1172	-282.221	-67.4525	30.2844
1173	-282.146	-67.4345	30.3024
1174	-281.97	-67.3924	30.3444
1175	-281.917	-67.3799	30.357
1176	-281.481	-67.2756	30.4612
1177	-281.415	-67.2597	30.4771
1178	-281.24	-67.218	30.5189
1179	-280.805	-67.1139	30.6229
1180	-280.642	-67.075	30.6618
1181	-280.63	-67.0723	30.6646
1182	-280.6	-67.065	30.6719
1183	-280.591	-67.0627	30.6741
1184	-280.515	-67.0448	30.6921
1185	-280.136	-66.9542	30.7827
1186	-279.847	-66.8849	30.8519
1187	-279.68	-66.845	30.8918
1188	-279.662	-66.8408	30.8961
1189	-279.51	-66.8045	30.9323
1190	-278.892	-66.6567	31.0802
1191	-278.323	-66.5207	31.2162
1192	-278.245	-66.5022	31.2347
1193	-278.194	-66.4899	31.2469
1194	-278.179	-66.4864	31.2505
1195	-277.951	-66.4318	31.305
1196	-277.656	-66.3613	31.3756
1197	-277.654	-66.3609	31.376
1198	-277.457	-66.3138	31.4231
1199	-276.679	-66.1279	31.6089
1200	-276.651	-66.1213	31.6156
1201	-276.548	-66.0964	31.6404
1202	-276.317	-66.0413	31.6956
1203	-276.112	-65.9924	31.7445
1204	-275.351	-65.8105	31.9264
1205	-275.307	-65.7999	31.9369
1206	-275.129	-65.7575	31.9794
1207	-275.077	-65.7449	31.992
1208	-274.984	-65.7227	32.0142
1209	-274.334	-65.5675	32.1694
1210	-273.508	-65.3699	32.3669
1211	-273.492	-65.3661	32.3707
1212	-273.462	-65.359	32.3778
1213	-273.413	-65.3473	32.3896
1214	-273.337	-65.3291	32.4077
1215	-273.202	-65.2969	32.4399
1216	-273.178	-65.2912	32.4456
1217	-272.212	-65.0603	32.6765
1218	-271.975	-65.0035	32.7334
1219	-271.531	-64.8975	32.8393
1220	-271.351	-64.8545	32.8823
1221	-270.956	-64.7601	32.9767
1222	-270.879	-64.7416	32.9952
1223	-270.655	-64.6881	33.0488
1224	-270.278	-64.5979	33.139
1225	-270.154	-64.5684	33.1685
1226	-270.131	-64.5629	33.174
1227	-270.084	-64.5516	33.1852
1228	-269.807	-64.4853	33.2515
1229	-269.732	-64.4676	33.2693
1230	-269.234	-64.3484	33.3885
1231	-268.985	-64.289	33.4478
1232	-268.862	-64.2596	33.4773
1233	-268.768	-64.2372	33.4997
1234	-268.537	-64.1819	33.555
1235	-268.525	-64.1789	33.5579
1236	-268.418	-64.1535	33.5833
1237	-268.272	-64.1184	33.6184
1238	-267.817	-64.0098	33.7271
1239	-267.608	-63.9598	33.777
1240	-267.454	-63.9229	33.8139
1241	-267.021	-63.8195	33.9173
1242	-267.017	-63.8186	33.9183
1243	-266.69	-63.7405	33.9964
1244	-266.496	-63.6941	34.0428
1245	-266.432	-63.6788	34.058
1246	-266.362	-63.6621	34.0747
1247	-266.037	-63.5843	34.1526
1248	-265.565	-63.4714	34.2654
1249	-265.491	-63.454	34.2829
1250	-265.253	-63.397	34.3398
1251	-265.225	-63.3904	34.3465
1252	-264.835	-63.2972	34.4397
1253	-264.751	-63.277	34.4599
1254	-264.673	-63.2585	34.4784
1255	-264.597	-63.2402	34.4967
1256	-264.522	-63.2222	34.5147
1257	-264.476	-63.2113	34.5255
1258	-264.388	-63.1903	34.5465
1259	-264.283	-63.1652	34.5717
1260	-264.219	-63.1499	34.587
1261	-263.855	-63.063	34.6739
1262	-263.519	-62.9826	34.7543
1263	-263.479	-62.973	34.7639
1264	-263.413	-62.9573	34.7795
1265	-263.329	-62.9372	34.7997
1266	-263.311	-62.9328	34.8041
1267	-262.827	-62.8172	34.9196
1268	-262.618	-62.7672	34.9696
1269	-262.55	-62.751	34.9859
1270	-262.389	-62.7126	35.0243
1271	-262.353	-62.7038	35.033
1272	-262.147	-62.6546	35.0823
1273	-262.124	-62.6492	35.0877
1274	-262.003	-62.6202	35.1167
1275	-261.764	-62.5631	35.1738
1276	-261.706	-62.5493	35.1876
1277	-261.637	-62.5327	35.2042
1278	-261.599	-62.5238	35.2131
1279	-261.461	-62.4906	35.2462
1280	-261.357	-62.4658	35.2711
1281	-261.09	-62.4019	35.3349
1282	-260.963	-62.3716	35.3653
1283	-260.783	-62.3286	35.4082
1284	-260.774	-62.3264	35.4105
1285	-260.692	-62.307	35.4299
1286	-260.184	-62.1855	35.5514
1287	-260.154	-62.1782	35.5586
1288	-260.138	-62.1745	35.5623
1289	-259.909	-62.1197	35.6171
1290	-259.721	-62.0749	35.6619
1291	-259.639	-62.0553	35.6816
1292	-259.395	-61.9969	35.7399
1293	-259.173	-61.9439	35.7929
1294	-259.065	-61.918	35.8189
1295	-258.679	-61.8259	35.911
1296	-258.158	-61.7012	36.0356
1297	-258.08	-61.6826	36.0543
1298	-258.042	-61.6734	36.0634
1299	-258.012	-61.6663	36.0706
1300	-257.824	-61.6213	36.1156
1301	-257.742	-61.6019	36.135
1302	-257.272	-61.4895	36.2473
1303	-257.196	-61.4712	36.2656
1304	-256.798	-61.3761	36.3607
1305	-256.691	-61.3507	36.3862
1306	-256.609	-61.3311	36.4058
1307	-256.582	-61.3245	36.4124
1308	-256.513	-61.3082	36.4287
1309	-256.367	-61.2731	36.4637
1310	-255.495	-61.0647	36.6721
1311	-255.295	-61.0169	36.72
1312	-255.272	-61.0115	36.7253
1313	-255.196	-60.9934	36.7435
1314	-255.164	-60.9856	36.7513
1315	-254.988	-60.9435	36.7934
1316	-254.834	-60.9069	36.8299
1317	-254.556	-60.8403	36.8966
1318	-254.21	-60.7576	36.9793
1319	-254.05	-60.7194	37.0175
1320	-254.008	-60.7094	37.0275
1321	-253.89	-60.6812	37.0556
1322	-253.796	-60.6587	37.0781
1323	-253.659	-60.626	37.1109
1324	-253.55	-60.6	37.1369
1325	-253.522	-60.5932	37.1437
1326	-253.363	-60.5552	37.1816
1327	-253.205	-60.5175	37.2193
1328	-252.883	-60.4405	37.2964
1329	-252.804	-60.4217	37.3152
1330	-252.616	-60.3766	37.3603
1331	-252.46	-60.3393	37.3975
1332	-252.434	-60.3332	37.4036
1333	-252.408	-60.3269	37.41
1334	-252.27	-60.294	37.4429
1335	-252.05	-60.2413	37.4955
1336	-251.959	-60.2196	37.5172
1337	-251.647	-60.145	37.5918
1338	-251.349	-60.0738	37.663
1339	-251.137	-60.0233	37.7136
1340	-250.973	-59.9841	37.7528
1341	-250.65	-59.9067	37.8302
1342	-250.554	-59.8839	37.8529
1343	-250.522	-59.8761	37.8607
1344	-250.328	-59.8299	37.9069
1345	-250.308	-59.825	37.9118
1346	-250.172	-59.7924	37.9444
1347	-249.927	-59.734	38.0028
1348	-249.203	-59.5609	38.176
1349	-248.795	-59.4633	38.2735
1350	-248.671	-59.4337	38.3031
1351	-248.624	-59.4224	38.3144
1352	-248.584	-59.413	38.3239
1353	-248.008	-59.2754	38.4614
1354	-247.873	-59.2432	38.4937
1355	-247.806	-59.227	38.5099
1356	-247.689	-59.1991	38.5377
1357	-247.582	-59.1735	38.5633
1358	-246.55	-58.9269	38.81
1359	-246.206	-58.8446	38.8923
1360	-245.928	-58.7782	38.9587
1361	-245.849	-58.7594	38.9775
1362	-245.494	-58.6744	39.0625
1363	-245.214	-58.6074	39.1294
1364	-245.041	-58.5662	39.1706
1365	-243.834	-58.2777	39.4591
1366	-243.155	-58.1154	39.6215
1367	-241.724	-57.7733	39.9636
1368	-241.582	-57.7394	39.9974
1369	-241.226	-57.6545	40.0824
1370	-240.356	-57.4463	40.2905
1371	-239.939	-57.3467	40.3902
1372	-239.233	-57.1782	40.5587
1373	-239.192	-57.1682	40.5687
1374	-239.163	-57.1613	40.5755
1375	-238.426	-56.9852	40.7516
1376	-236.85	-56.6084	41.1285
1377	-236.603	-56.5494	41.1875
1378	-236.515	-56.5284	41.2084
1379	-236.503	-56.5256	41.2113
1380	-236.035	-56.4137	41.3231
1381	-235.437	-56.2708	41.466
1382	-234.611	-56.0735	41.6634
1383	-234.59	-56.0683	41.6686
1384	-234.121	-55.9563	41.7806
1385	-233.97	-55.9201	41.8168
1386	-233.592	-55.8298	41.907
1387	-233.398	-55.7834	41.9535
1388	-233.136	-55.7207	42.0161
1389	-232.894	-55.6631	42.0737
1390	-232.782	-55.6363	42.1005
1391	-232.275	-55.5152	42.2217
1392	-231.859	-55.4157	42.3212
1393	-231.557	-55.3434	42.3935
1394	-231.275	-55.2762	42.4607
1395	-230.856	-55.1759	42.561
1396	-230.36	-55.0573	42.6795
1397	-230.308	-55.0449	42.692
1398	-229.98	-54.9666	42.7703
1399	-229.74	-54.9091	42.8277
1400	-229.59	-54.8733	42.8635
1401	-228.684	-54.6568	43.08
1402	-228.613	-54.6399	43.0969
1403	-228.492	-54.6108	43.1261
1404	-227.413	-54.353	43.3838
1405	-226.993	-54.2527	43.4842
1406	-226.116	-54.043	43.6939
1407	-226.101	-54.0394	43.6974
1408	-225.681	-53.939	43.7979
1409	-225.617	-53.9239	43.813
1410	-220.144	-52.6156	45.1212
1411	-220.137	-52.6139	45.1229
1412	-218.288	-52.1721	45.5647
1413	-207.428	-49.5765	48.1604
1414	-206.543	-49.365	48.3718
1415	-203.142	-48.5522	49.1847
1416	-202.874	-48.488	49.2489
1417	-200.834	-48.0005	49.7363
1418	-200.568	-47.9369	49.7999
1419	-198.724	-47.4962	50.2407
1420	-197.429	-47.1868	50.5501
1421	-197.309	-47.158	50.5789
1422	-196.827	-47.0429	50.694
1423	-196.441	-46.9505	50.7864
1424	-196.23	-46.9002	50.8367
1425	-196.082	-46.8646	50.8722
1426	-194.074	-46.3848	51.3521
1427	-193.042	-46.138	51.5988
1428	-187.4	-44.7898	52.9471
1429	-185.894	-44.4297	53.3072
